# Supplementary material for: A large-scale chloroplast phylogeny of the Lamiaceae sheds new light on its subfamilial classification
Source: PubMed Central journal article supplement (PMC5066227; doi:10.1038/srep34343), 2016-10-17

# **A large-scale chloroplast phylogeny of the Lamiaceae sheds new light on its subfamilial classification**

**Bo Li<sup>1,+</sup>, Philip D. Cantino<sup>2,+</sup>, Richard G. Olmstead<sup>3,+</sup>, Gemma L. C. Bramley<sup>4</sup>, Chun-Lei Xiang<sup>5</sup>, Zhong-Hui Ma<sup>6</sup>, Yun-Hong Tan<sup>7</sup> & Dian-Xiang Zhang<sup>8,\*</sup>**

<sup>1</sup> College of Agronomy, Jiangxi Agricultural University, Nanchang, 330045, Jiangxi, P. R. China

<sup>2</sup> Department of Environmental and Plant Biology, Ohio University, Athens, Ohio 45701-2979, U. S. A.

<sup>3</sup> Department of Biology and Burke Museum, University of Washington, Box 355325, Seattle, Washington 98195-5325, U. S. A.

<sup>4</sup> Herbarium, Royal Botanic Gardens Kew, Richmond, Surrey, TW9 3AE, U.K.

<sup>5</sup> Key Laboratory for Plant Diversity and Biogeography of East Asia, Kunming Institute of Botany, Chinese Academy of Sciences, Kunming 650201, Yunnan, P. R. China

<sup>6</sup> College of Agriculture, Guangxi University, Nanning 530004, Guangxi, P. R. China

<sup>7</sup> Key Laboratory of Tropical Forest Ecology, Xishuangbanna Tropical Botanical Garden, Chinese Academy of Sciences, Mengla 666303, Yunnan, P. R. China

<sup>8</sup> South China Botanical Garden, Chinese Academy of Sciences, Guangzhou 510650, Guangdong, P. R. China

<sup>+</sup>these authors contributed equally to this work

<sup>\*</sup> Corresponding author: dx-zhang@scbg.ac.cn

keywords: cpDNA, new subfamily, phylogenetic nomenclature, phylogenetic systematics, taxonomy

**Supplementary Table S1.** List of taxa included in the phylogeny of Lamiaceae study. “Taxa” refers species or genus included in the combined dataset D270; a single generic name indicates that different gene regions were represented by different species of the genus; taxa marked by symbol “\*” means that the taxa was excluded in the reduced dataset D155. “Classification” indicates the families and subfamilies to which the ingroup and outgroup species belongs; LA represents Lamiaceae; Aj, Cy, La, Ne, Per, Pre, Pro, Sc, Sy and Vi connected with LA by “-” represent the ten subfamilies of Lamiaceae recognized by Harley *et al.*<sup>1</sup>, Olmstead<sup>2</sup> and the present study, viz., Ajugoideae, Cymarioideae, Lamioideae, Nepetoideae, Peronematoideae, Premnoideae, Prostantheroideae, Scutellarioideae, Symphorematoideae and Viticoideae, respectively. “matK” “ndhF” “rbcL” “rps16” and “trnL-F” present GenBank accession numbers for each molecular marker; sequences generated in this study are marked by symbol “●”; “-” refers to missing sequence.

| <i>Taxa</i>                                     | Classification | matK                                      | ndhF                                            | rbcL                                            | rps16                                  | trnL-F                              |
|-------------------------------------------------|----------------|-------------------------------------------|-------------------------------------------------|-------------------------------------------------|----------------------------------------|-------------------------------------|
| * <i>Acanthomintha lanceolata</i> Curran        | LA-Ne          | GU381737                                  | -                                               | -                                               | -                                      | DQ667522                            |
| * <i>Achyrosperrum fruticosum</i> Benth.        | LA-La          | HQ911420                                  | -                                               | -                                               | FJ854004                               | FJ854251, FJ854138                  |
| * <i>Acrotome inflata</i> Benth.                | LA-La          | HQ911533                                  | -                                               | -                                               | EU138225                               | EU138378, EU138300                  |
| <i>Acrymia ajugiflora</i> Prain                 | LA-Cy          | -                                         | ●                                               | -                                               | HQ911584                               | ●                                   |
| <i>Aegiphila</i> Jacq.                          | LA-Aj          | JQ588060<br><i>A. panamensis</i> Moldenke | AY310121<br><i>A. costaricensis</i><br>Moldenke | JQ594359<br><i>A. costaricensis</i><br>Moldenke | JQ322783<br><i>A. sellowiana</i> Cham. | FJ952070<br><i>A. alba</i> Moldenke |
| * <i>Aeollanthus densiflorus</i> Ryding         | LA-Ne          | -                                         | -                                               | -                                               | AJ505328                               | AJ505435                            |
| * <i>Agastache foeniculum</i> (Pursh)<br>Kuntze | LA-Ne          | AY840146                                  | -                                               | Z37381                                          | -                                      | JQ669022                            |
| <i>Ajuga decumbens</i> Thunb.                   | LA-Aj          | AF315299                                  | JQ322521                                        | JQ322527                                        | -                                      | EF153683                            |
| <i>Ajuga reptans</i> L.                         | LA-Aj          | HQ911379                                  | L36391                                          | Z37385                                          | HQ911574                               | HQ911643, HQ911712                  |
| * <i>Ajugoides humilis</i> (Miq.) Makino        | LA-La          | HQ9114525                                 | -                                               | -                                               | HQ911609                               | HQ911678, HQ911746                  |
| * <i>Alvesia rosmarinifolia</i> Welw.           | LA-Ne          | -                                         | -                                               | -                                               | AJ505329                               | AJ505436                            |
| * <i>Amasonia</i> sp.                           | LA-Aj          | -                                         | AY310122                                        | -                                               | -                                      | FJ952066                            |
| * <i>Amethystea caerulea</i> L.                 | LA-Aj          | -                                         | AY115882                                        | -                                               | -                                      | ●                                   |
| * <i>Anisochilus pallidus</i> Wall.             | LA-Ne          | -                                         | -                                               | JQ933218                                        | AJ505331                               | AJ505438                            |
| <i>Anisomeles indica</i> (L.) Kuntze            | LA-La          | HQ911395                                  | ●                                               | FJ513149                                        | FJ854012                               | FJ854259, FJ854146                  |

|                                                       |        |          |          |  |          |          |                    |
|-------------------------------------------------------|--------|----------|----------|--|----------|----------|--------------------|
| <i>Ballota africana</i> (L.) Benth.                   | LA-La  | FQ911493 | -        |  | AM234997 | FJ854014 | FJ854261, FJ854148 |
| <i>Ballota nigra</i> L.                               | LA-La  | HQ911497 | -        |  | HM849806 | FJ854017 | HQ911698, FJ854151 |
| * <i>Basilicum polystachyon</i> (L.) Moench           | LA-Ne  | -        | -        |  | -        | AJ505332 | AJ505439           |
| * <i>Blephilia ciliata</i> (L.) Raf. ex Benth.        | LA-Ne  | GU381743 | -        |  | -        | -        | GU381580           |
| * <i>Bostrychanthera deflexa</i> Benth.               | LA-La  | HQ911423 | -        |  | -        | FJ854020 | FJ854267, FJ854154 |
| * <i>Brachysola coerulea</i> (F. Muell. & Tate) Rye   | LA-Pro | -        | •        |  | -        | -        | •                  |
| * <i>Brazoria arenaria</i> Lundell                    | LA-La  | HQ911431 | -        |  | -        | FJ854021 | EF546967, EF546891 |
| <i>Callicarpa americana</i> L.                        | LA     | •        | •        |  | •        | •        | •                  |
| <i>Callicarpa angusta</i> Schauer                     | LA     | •        | •        |  | •        | •        | •                  |
| <i>Callicarpa arborea</i> Roxb.                       | LA     | •        | •        |  | •        | •        | •                  |
| <i>Callicarpa bodinieri</i> H. Lévl.                  | LA     | •        | •        |  | •        | •        | •                  |
| <i>Callicarpa brevipes</i> (Benth.) Hance             | LA     | •        | •        |  | •        | •        | •                  |
| <i>Callicarpa cathayana</i> C. H. Chang               | LA     | •        | •        |  | •        | •        | •                  |
| <i>Callicarpa dichotoma</i> (Lour.) K. Koch           | LA     | •        | •        |  | •        | •        | •                  |
| <i>Callicarpa erioclona</i> Schauer                   | LA     | •        | •        |  | •        | •        | •                  |
| <i>Callicarpa glandulosa</i> H. R. Fletcher           | LA     | •        | •        |  | •        | •        | •                  |
| <i>Callicarpa hispida</i> (Moldenke) Bramley          | LA     | •        | •        |  | •        | •        | •                  |
| <i>Callicarpa japonica</i> Thunb.                     | LA     | •        | •        |  | •        | •        | •                  |
| <i>Callicarpa kwangtungensis</i> Chun                 | LA     | •        | •        |  | •        | •        | •                  |
| <i>Callicarpa maingayi</i> King & Gamble              | LA     | •        | •        |  | •        | •        | •                  |
| <i>Callicarpa mollis</i> Siebold & Zucc.              | LA     | HQ384498 | AY310134 |  | HQ384868 | HQ385145 | HQ412928           |
| <i>Callicarpa pedunculata</i> R. Br.                  | LA     | •        | •        |  | •        | •        | JQ669025           |
| <i>Callicarpa peii</i> C. H. Chang                    | LA     | •        | •        |  | •        | •        | •                  |
| <i>Callicarpa pentandra</i> Roxb.                     | LA     | •        | •        |  | •        | •        | •                  |
| <i>Callicarpa scandens</i> (Moldenke) Govaerts        | LA     | -        | •        |  | •        | •        | •                  |
| * <i>Capitanopsis angustifolia</i> (Moldenke) Capuron | LA-Ne  | -        | -        |  | -        | AJ505333 | AJ505440           |
| <i>Caryopteris incana</i> (Thunb. ex                  | LA-Aj  | AF315295 | U78681   |  | U28869   | -        | JF3013596          |

|                                                          |        |          |          |                                                      |                                                             |                                                             |
|----------------------------------------------------------|--------|----------|----------|------------------------------------------------------|-------------------------------------------------------------|-------------------------------------------------------------|
| Houtt.) Miq.                                             |        |          |          |                                                      |                                                             |                                                             |
| * <i>Catoferia chiapensis</i> A. Gray ex Benth.          | LA-Ne  | -        | -        | -                                                    | AJ505414                                                    | AJ505537                                                    |
| * <i>Cedronella canariensis</i> (L.) Webb & Berthel.     | LA-Ne  | HM850788 | -        | HM849871                                             | -                                                           | AY506622                                                    |
| * <i>Chaiturus marrubiastrum</i> (L.) Ehrh. ex Rchb.     | LA-La  | HQ911464 | -        | -                                                    | FJ854022                                                    | FJ854268, FJ854155                                          |
| * <i>Chamaesphacos ilicifolius</i> Schrenk               | LA-La  | HQ911549 | -        | -                                                    | FJ854023                                                    | FJ854269, FJ854156                                          |
| * <i>Chelonopsis moschata</i> Miq.                       | LA-La  | HQ911425 | -        | -                                                    | FJ854025                                                    | FJ854270, FJ854157                                          |
| * <i>Chloanthes parviflora</i> Walp.                     | LA-Pro | -        | ●        | -                                                    | -                                                           | ●                                                           |
| <i>Clerodendrum japonicum</i> (Thunb.) Sweet             | LA-Aj  | AF315297 | AY115886 | GQ436521                                             | HQ911575                                                    | HQ911644, HQ911713                                          |
| <i>Clerodendrum trichotomum</i> Thunb.                   | LA-Aj  | AF477760 | AF130146 | HQ384865                                             | HQ385140                                                    | FJ952051                                                    |
| <i>Clinopodium vulgare</i> L.                            | LA-Ne  | AY840153 | -        | HM849904                                             | AJ505426                                                    | DQ667513                                                    |
| <i>Colebrookea oppositifolia</i> Sm.                     | LA-La  | HQ911391 | U78688   | U78712                                               | HQ911587                                                    | HQ911657, HQ911725                                          |
| * <i>Coleus</i> Lour.                                    | LA-Ne  | -        | -        | HQ839694<br><i>C. carnosifolius</i> (Hemsl.)<br>Dunn | FJ593291<br><i>C. xanthanthus</i> C. Y. Wu<br>& Y. C. Huang | FJ593411<br><i>C. xanthanthus</i> C. Y. Wu<br>& Y. C. Huang |
| * <i>Collinsonia canadensis</i> L.                       | LA-Ne  | AY840148 | -        | Z37387                                               | -                                                           | AY570453                                                    |
| <i>Comanthosphace japonica</i> (Miq.) S. Moore           | LA-La  | HQ911409 | ●        | -                                                    | FJ854031                                                    | FJ854274, FJ854161                                          |
| <i>Congea tomentosa</i> Roxb. 1                          | LA-Sy  | HQ384499 | HQ384815 | HQ384869                                             | AJ505411                                                    | HQ412929                                                    |
| <i>Congea tomentosa</i> Roxb. 2                          | LA-Sy  | -        | U78689   | U28870                                               | -                                                           | AJ505530                                                    |
| * <i>Conradina canescens</i> A. Gray                     | LA-Ne  | GU381749 | -        | -                                                    | -                                                           | DQ667438                                                    |
| <i>Cornutia pyramidata</i> L. 1                          | LA-Pre | HQ911375 | ●        | JQ592284                                             | HQ911571                                                    | ●                                                           |
| <i>Cornutia pyramidata</i> L. 2                          | LA-Pre | ●        | ●        | ●                                                    | ●                                                           | ●                                                           |
| <i>Craniotome furcata</i> (Link) Kuntze                  | LA-La  | HQ911392 | -        | JQ933281                                             | FJ854032                                                    | FJ854275, FJ854162                                          |
| * <i>Cuminia eriantha</i> (Benth.) Benth.                | LA-Ne  | GU381729 | -        | -                                                    | -                                                           | GU381566                                                    |
| * <i>Cunila origanoides</i> (L.) Britton                 | LA-Ne  | GU381752 | -        | -                                                    | -                                                           | JQ669034                                                    |
| * <i>Cyanostegia angustifolia</i> Turcz.                 | LA-Pro | -        | ●        | -                                                    | -                                                           | ●                                                           |
| * <i>Cyclotrichium niveum</i> (Boiss.) Manden. & Scheng. | LA-Ne  | GU381691 | -        | -                                                    | -                                                           | GU381525                                                    |
| <i>Cymaria acuminata</i> Decne.                          | LA-Cy  | KF509859 | KF509863 | KF509870                                             | FJ853997                                                    | FJ854244 FJ854131                                           |
| <i>Cymaria dichotoma</i> Benth.                          | LA-Cy  | HQ911388 | ●        | -                                                    | FJ853998                                                    | FJ854245 FJ854132                                           |
| * <i>Dauphinea brevilabra</i> Hedge                      | LA-Ne  | -        | -        | -                                                    | AJ505334                                                    | AJ505441                                                    |

|                                                                      |        |                                                  |                                           |                                           |                                                  |                                                            |
|----------------------------------------------------------------------|--------|--------------------------------------------------|-------------------------------------------|-------------------------------------------|--------------------------------------------------|------------------------------------------------------------|
| * <i>Dicrastylis fulva</i> Drumm. ex Harv.                           | LA-Pro | -                                                | •                                         | -                                         | -                                                | •                                                          |
| * <i>Dorystaechas hastata</i> Boiss. & Heldr. ex Benth.              | LA-Ne  | -                                                | -                                         | AY570383                                  | -                                                | AY570454                                                   |
| * <i>Dracocephalum moldavica</i> L.                                  | LA-Ne  | -                                                | -                                         | Z37389                                    | -                                                | AY506625                                                   |
| <i>Elsholtzia stauntonii</i> Benth.                                  | LA-Ne  | -                                                | U786909                                   | U28872                                    | AJ505406                                         | AJ505526                                                   |
| <i>Eremostachys</i> Bunge                                            | LA-La  | HQ911485<br><i>E. molucelloides</i> Bunge        | -                                         | AF501985<br><i>E. labiosa</i> Bunge       | GU993165<br><i>E. laevigata</i> Bunge            | GU993260, GU993069<br><i>E. laevigata</i> Bunge            |
| <i>Eriophyton wallichii</i> Benth.                                   | LA-La  | HQ911462                                         | -                                         | JF941487                                  | FJ854034                                         | FJ854277, FJ854164                                         |
| * <i>Eurysolen gracilis</i> Prain                                    | LA-La  | HQ911402                                         | -                                         | -                                         | HQ911593                                         | HQ911665, HQ911733                                         |
| <i>Faradaya</i> F. Muell.                                            | LA-Aj  | HQ911381<br><i>F. amicornum</i> (Seem.)<br>Seem. | AY310127<br><i>F. splendida</i> F. Muell. | JF738822<br><i>F. splendida</i> F. Muell. | HQ911576<br><i>F. amicornum</i> (Seem.)<br>Seem. | HQ911645, HQ911714<br><i>F. amicornum</i> (Seem.)<br>Seem. |
| * <i>Fuerstia africana</i> T. C. E. Fr.                              | LA-Ne  | -                                                | -                                         | -                                         | AJ505427                                         | AJ505550                                                   |
| <i>Garrettia siamensis</i> H. R. Fletcher 1                          | LA-Per | •                                                | •                                         | •                                         | •                                                | •                                                          |
| <i>Garrettia siamensis</i> H. R. Fletcher 2                          | LA-Per | •                                                | •                                         | •                                         | •                                                | •                                                          |
| <i>Garrettia siamensis</i> H. R. Fletcher 3                          | LA-Per | •                                                | •                                         | •                                         | •                                                | •                                                          |
| * <i>Garrettia siamensis</i> H. R. Fletcher 4                        | LA-Per | -                                                | -                                         | -                                         | HQ911579                                         | HQ911648 HQ911717                                          |
| <i>Glechoma hederacea</i> L.                                         | LA-Ne  | AY840143                                         | U78691                                    | Z37391                                    | -                                                | AY570455                                                   |
| <i>Gmelina arborea</i> Roxb. ex Sm. 1                                | LA-Pre | •                                                | •                                         | •                                         | •                                                | •                                                          |
| <i>Gmelina arborea</i> Roxb. ex Sm. 2                                | LA-Pre | •                                                | •                                         | •                                         | •                                                | •                                                          |
| <i>Gmelina hainanensis</i> Oliv.                                     | LA-Pre | •                                                | JQ322518                                  | JQ322524                                  | •                                                | •                                                          |
| <i>Gmelina hystrix</i> Schult. ex Kurz                               | LA-Pre | -                                                | U78692                                    | U28873                                    | AJ505407                                         | AJ505527                                                   |
| <i>Gmelina philippensis</i> Cham.                                    | LA-Pre | •                                                | •                                         | •                                         | •                                                | •                                                          |
| * <i>Gomphostemma javanicum</i> (Blume) Benth.                       | LA-La  | -                                                | -                                         | AF501986                                  | FJ854038                                         | AF502028, EF546860                                         |
| * <i>Hanceola sinensis</i> (Hemsl.) Kudô                             | LA-Ne  | -                                                | -                                         | -                                         | FJ593294                                         | FJ593415                                                   |
| <i>Haplostachys haplostachya</i> (A. Gray) H. St. John               | LA-La  | HQ911565                                         | -                                         | AF501987                                  | FJ854039                                         | KF235643, KF235696                                         |
| * <i>Haumaniastrum katangense</i> (S. Moore) P. A. Duvign. & Plancke | LA-Ne  | -                                                | -                                         | -                                         | AJ505417                                         | AJ505540                                                   |
| * <i>Hedeoma costata</i> Hemsl.                                      | LA-Ne  | GU381755                                         | -                                         | -                                         | -                                                | DQ667436                                                   |
| * <i>Hemiandra pungens</i> R.Br.                                     | LA-Pro | -                                                | •                                         | -                                         | -                                                | •                                                          |
| <i>Hemigenia</i> R.Br.                                               | LA-Pro | HQ911374<br><i>H. pedunculata</i> Diels          | •<br><i>H. incana</i> (Lindl.) Benth.     | -                                         | HQ911570<br><i>H. pedunculata</i> Diels          | •<br><i>H. incana</i> (Lindl.) Benth.                      |

|                                                              |        |                                                  |                                                |                                                     |                                                     |                                                     |
|--------------------------------------------------------------|--------|--------------------------------------------------|------------------------------------------------|-----------------------------------------------------|-----------------------------------------------------|-----------------------------------------------------|
| * <i>Hemiphora elderi</i> (F. Muell.)<br>F.Muell.            | LA-Pro | -                                                | •                                              | -                                                   | -                                                   | •                                                   |
| * <i>Hesperozygis nitida</i> (Benth.)<br>Epling              | LA-Ne  | GU381730                                         | -                                              | -                                                   | -                                                   | GU381567                                            |
| * <i>Hoehnea epilobioides</i> (Epling)<br>Epling             | LA-Ne  | GU381731                                         | -                                              | -                                                   | -                                                   | DQ667497                                            |
| <i>Holmskioldia sanguinea</i> Retz.                          | LA-Sc  | HQ911382                                         | U78693                                         | U28874                                              | HQ911581                                            | HQ911651, HQ911719                                  |
| <i>Holocheila longipedunculata</i> S.<br>Chow                | LA-La  | AF315304                                         | KF509860                                       | KF509867                                            | KF509871                                            | KF509874, KF509880                                  |
| * <i>Holostylon katangense</i> Robyns &<br>Lebrun            | LA-Ne  | -                                                | -                                              | -                                                   | AJ505335                                            | AJ505443                                            |
| * <i>Horminum pyrenaicum</i> L.                              | LA-Ne  | AY840177                                         | -                                              | -                                                   | -                                                   | AY570456                                            |
| * <i>Hoslundia opposita</i> Vahl                             | LA-Ne  | -                                                | -                                              | -                                                   | AJ505428                                            | AJ505551                                            |
| * <i>Huxleya linifolia</i> Ewart & B. Rees                   | LA-Aj  | -                                                | AY310128                                       | -                                                   | -                                                   | -                                                   |
| <i>Hymenopyramis brachiata</i> Wall. ex<br>Griff.            | LA-Per | •                                                | •                                              | •                                                   | •                                                   | •                                                   |
| * <i>Hymenopyramis cana</i> Craib                            | LA-Per | -                                                | KF509865                                       | -                                                   | -                                                   | KF509879 KF509885                                   |
| <i>Hymenopyramis siamensis</i> Craib                         | LA-Per | •                                                | •                                              | •                                                   | •                                                   | •                                                   |
| * <i>Hypenia macrantha</i> (A. St.-Hil. ex<br>Benth.) Harley | LA-Ne  | -                                                | -                                              | -                                                   | AJ505336                                            | AJ505445                                            |
| * <i>Hypogomphia turkestanica</i> Bunge                      | LA-La  | HQ911551                                         | -                                              | -                                                   | HQ911634                                            | HQ911703, HQ911774                                  |
| <i>Hyptis</i> Jacq.                                          | LA-Ne  | JF357886<br><i>H. brevipes</i> Poit.             | -                                              | JQ592289<br><i>H. brevipes</i> Poit.                | AJ505337<br><i>H. capitata</i> Jacq.                | AJ505448<br><i>H. brevipes</i> Poit.                |
| <i>Hyssopus</i> L.                                           | LA-Ne  | -                                                | •<br><i>H. seravschanicus</i> (Dubj.)<br>Pazij | Z37395<br><i>H. officinalis</i> L.                  | -                                                   | •<br><i>H. seravschanicus</i> (Dubj.)<br>Pazij      |
| <i>Isodon</i> (Schrad. ex Benth.) Spach                      | LA-Ne  | JF954195<br><i>I. bulleyanus</i> (Diels)<br>Kudô | -                                              | HQ839688<br><i>I. rubescens</i> (Hemsl.) H.<br>Hara | JQ389539<br><i>I. rubescens</i> (Hemsl.) H.<br>Hara | JQ389559<br><i>I. rubescens</i> (Hemsl.) H.<br>Hara |
| * <i>Isoleucas arabica</i> O. Schwartz                       | LA-La  | HQ911508                                         | -                                              | -                                                   | EU138227                                            | EU138380, EU138303                                  |
| * <i>Kalaharia uncinata</i> (Schinz)<br>Moldenke             | LA-Aj  | -                                                | AY310130                                       | -                                                   | -                                                   | FJ952076                                            |
| <i>Karomia speciosa</i> (Hutch. &<br>Corbishley) R. Fern.    | LA-Aj  | JF270836                                         | AY310131                                       | JF265489                                            | -                                                   | •                                                   |
| * <i>Kurzamra pulchella</i> (Clos) Kuntze                    | LA-Ne  | GU381758                                         | -                                              | -                                                   | -                                                   | GU381598                                            |
| * <i>Lachnostachys eriobotrya</i> (F.<br>Muell.) Druce       | LA-Pro | -                                                | •                                              | -                                                   | -                                                   | •                                                   |
| * <i>Lagochilus hirtus</i> Fisch. & C. A.<br>Mey.            | LA-La  | HQ911469                                         | -                                              | -                                                   | FJ854041                                            | FJ854280, FJ854168                                  |

|                                                             |               |                                                                                    |                                               |                                                              |                                                                                    |                                                                        |
|-------------------------------------------------------------|---------------|------------------------------------------------------------------------------------|-----------------------------------------------|--------------------------------------------------------------|------------------------------------------------------------------------------------|------------------------------------------------------------------------|
| <i>Lagopsis</i> (Bunge ex Benth.) Bunge                     | LA-La         | HQ911472<br><i>L. marrubiastrum</i><br>(Stephan) Ikonn.-Gal.                       | -                                             | HQ839687<br><i>L. supina</i> (Stephan ex Willd.) Ikonn.-Gal. | HQ911618<br><i>L. supina</i> (Stephan ex Willd.) Ikonn.-Gal.                       | HQ911689, HQ911760<br><i>L. supina</i> (Stephan ex Willd.) Ikonn.-Gal. |
| <i>Lamium purpureum</i> L.                                  | LA-La         | JF7798771                                                                          | U78694                                        | Z3740320                                                     | HQ385141                                                                           | JF78002776                                                             |
| <i>Lavandula</i> L.                                         | LA-Ne         | GU391427<br><i>L. angustifolia</i> Mill.                                           | ●<br><i>L. lanata</i> Boiss.                  | Z37404<br><i>L. angustifolia</i> Mill.                       | JQ322781<br><i>L. stoechas</i> L.                                                  | AY570457<br><i>L. angustifolia</i> Mill.                               |
| <i>Leonotis leonurus</i> (L.) R. Br.                        | LA-La         | HQ911521                                                                           | -                                             | AM234998                                                     | JX0732795                                                                          | EU138382, EU138305                                                     |
| <i>Leonurus sibiricus</i> L.                                | LA-La         | HQ911471                                                                           | -                                             | HQ839683                                                     | FJ854045                                                                           | EF546930, EF546852                                                     |
| * <i>Lepechinia calycina</i> (Benth.) Epling                | LA-Ne         | -                                                                                  | -                                             | AY570386                                                     | -                                                                                  | JF301375                                                               |
| <i>Leucas</i> R. Br.                                        | LA-La         | HQ911520<br><i>L. minimifolia</i> Chiov.                                           | -                                             | AM234999<br><i>L. capensis</i> (Benth.) Engl.                | EU138266<br><i>L. minimifolia</i> Chiov.                                           | EU138419, EU138342<br><i>L. minimifolia</i> Chiov.                     |
| <i>Lindenbergia philippensis</i> (Cham. & Schlttdl.) Benth. | Orobanchaceae | AF051990                                                                           | AF123686                                      | AF123664                                                     | AJ609169                                                                           | AJ608586                                                               |
| * <i>Lycopus europaeus</i> L.                               | LA-Ne         | AY840154                                                                           | -                                             | HM850150                                                     | -                                                                                  | GU381478                                                               |
| * <i>Macbridea alba</i> Chapm.                              | LA-La         | HQ911428                                                                           | -                                             | -                                                            | HQ911598                                                                           | EF546962, EF546885                                                     |
| <i>Marrubium vulgare</i> L.                                 | LA-La         | HQ911499                                                                           | U78695                                        | U28875                                                       | EU138294                                                                           | EU138443, EU138366                                                     |
| * <i>Marsypianthes chamaedrys</i> (Vahl) Kuntze             | LA-Ne         | JQ588075                                                                           | -                                             | JQ592298                                                     | -                                                                                  | JF357815                                                               |
| * <i>Matsumurella tubrifera</i> (Makino) Makino             | LA-La         | HQ911453                                                                           | -                                             | -                                                            | HQ911610                                                                           | HQ911679, HQ911747                                                     |
| <i>Mazus reptans</i> N. E. Br.                              | Mazaceae      | HQ384502                                                                           | HQ384817                                      | HQ384872                                                     | HQ385147                                                                           | AF479004                                                               |
| <i>Melissa officinalis</i> L.                               | LA-Ne         | HM850795                                                                           | ●                                             | Z37413                                                       | AJ505410                                                                           | DQ667477                                                               |
| <i>Melittis melissophyllum</i> L.                           | LA-La         | HQ911534                                                                           | -                                             | HE963562                                                     | HQ911633                                                                           | HQ911702, HQ911773                                                     |
| <i>Mentha</i> L.                                            | LA-Ne         | GU381686<br><i>M. × rotundifolia</i> (L.) Huds.                                    | U78696<br><i>M. × rotundifolia</i> (L.) Huds. | Z37417<br><i>M. × rotundifolia</i> (L.) Huds.                | FJ593336<br><i>M. sp.</i>                                                          | GU381520<br><i>M. × rotundifolia</i> (L.) Huds.                        |
| * <i>Micromeria juliana</i> (L.) Benth. ex Rechb.           | LA-Ne         | AY840159                                                                           | -                                             | JQ933407                                                     | -                                                                                  | JQ669056                                                               |
| <i>Microcorys</i> R.Br.                                     | LA-Pro        | HQ911372<br><i>M. loganiacea</i> F. Muell.                                         | ●<br><i>M. exserta</i> Benth.                 | -                                                            | HQ911568<br><i>M. loganiacea</i> F. Muell.                                         | ●<br><i>M. exserta</i> Benth.                                          |
| * <i>Microtoena</i> Prain                                   | LA-La         | HQ911393<br><i>M. patchoulii</i> (C. B. Clarke ex Hook. f.) C. Y. Wu & S. J. Hsuan | -                                             | -                                                            | FJ854052<br><i>M. patchoulii</i> (C. B. Clarke ex Hook. f.) C. Y. Wu & S. J. Hsuan | HQ911658, HQ911726<br><i>M. delavayi</i> Prain                         |
| * <i>Minthostachys mollis</i> (Benth.) Griseb.              | LA-Ne         | GU381763                                                                           | -                                             | -                                                            | -                                                                                  | JQ669059                                                               |
| * <i>Moluccella</i> L.                                      | LA-La         | HQ911491<br><i>M. spinosa</i> L.                                                   | -                                             | -                                                            | FJ854055<br><i>M. laevis</i> L.                                                    | EU138444, EU138367<br><i>M. laevis</i> L.                              |

|                                                                             |               |                                    |                                     |                                  |                                                     |                                    |
|-----------------------------------------------------------------------------|---------------|------------------------------------|-------------------------------------|----------------------------------|-----------------------------------------------------|------------------------------------|
| * <i>Monarda fistulosa</i> L.                                               | LA-Ne         | GU381745                           | -                                   | Z37419                           | -                                                   | DQ667506                           |
| * <i>Monardella odoratissima</i> Benth.                                     | LA-Ne         | GU381744                           | -                                   | -                                | -                                                   | GU381581                           |
| * <i>Mosla chinensis</i> Maxim.                                             | LA-Ne         | HQ839706                           | -                                   | FJ513158                         | -                                                   | -                                  |
| <i>Nepeta</i> L.                                                            | LA-Ne         | HQ593369<br><i>N. cataria</i> L.   | -                                   | Z37421<br><i>N. cataria</i> L.   | AJ505326<br><i>N. straussii</i> Hauskn. &<br>Bornm. | DQ667487<br><i>N. cataria</i> L.   |
| * <i>Newcastelia cladotricha</i> F. Muell.                                  | LA-Pro        | -                                  | ●                                   | -                                | -                                                   | ●                                  |
| * <i>Obtegomeria caerulescens</i><br>(Benth.) Doroszenko & P. D.<br>Cantino | LA-Ne         | GU381759                           | -                                   | -                                | -                                                   | GU381599                           |
| <i>Ocimum</i> L.                                                            | LA-Ne         | AY177670<br><i>O. basilicum</i> L. | JN686623<br><i>O. americanum</i> L. | Z37425<br><i>O. basilicum</i> L. | FJ593338<br><i>O. basilicum</i> L.                  | AY570462<br><i>O. basilicum</i> L. |
| <i>Ombrocharis dulcis</i> Hand.-Mazz.                                       | LA-Ne         | -                                  | ●                                   | ●                                | -                                                   | ●                                  |
| <i>Oncinocalyx betchei</i> F. Muell.                                        | LA-Aj         | -                                  | U78685                              | U31458                           | -                                                   | JN408590                           |
| <i>Origanum vulgare</i> L.                                                  | LA-Ne         | GU381802                           | JX880022                            | Z37427                           | AJ505422                                            | AY570463                           |
| <i>Orthosiphon aristatus</i> (Blume) Miq.                                   | LA-Ne         | JN119569                           | -                                   | KF496653                         | FJ593340                                            | FJ593460                           |
| <i>Otostegia tomentosa</i> A. Rich.                                         | LA-La         | HQ911515                           | -                                   | AF501988                         | EU138286                                            | EU138440, EU138364                 |
| * <i>Oxera pulchella</i> Labill.                                            | LA-Aj         | -                                  | AY310132                            | -                                | -                                                   | FJ952077                           |
| * <i>Panzerina lanata</i> (L.) Soják                                        | LA-La         | HQ911474                           | -                                   | -                                | FJ854058                                            | FJ854289, FJ854176                 |
| * <i>Paraphlomis javanica</i> (Blume)<br>Prain                              | LA-La         | HQ911451                           | -                                   | -                                | FJ854060                                            | FJ854292, FJ854178                 |
| <i>Paulownia tomentosa</i> (Thunb.)<br>Steud.                               | Paulowniaceae | AJ429339                           | L36406                              | L36447                           | AJ431051                                            | AY423122                           |
| <i>Pedicularis groenlandica</i>                                             | Orobanchaceae | HQ384503                           | HQ384818                            | HQ384873                         | HQ385148                                            | HQ412930                           |
| * <i>Pentapleura subulifera</i> Hand.-<br>Mazz.                             | LA-Ne         | GU381781                           | -                                   | -                                | -                                                   | GU381625                           |
| <i>Perilla frutescens</i> (L.) Britton                                      | LA-Ne         | AF315307                           | JN686622                            | FJ513160                         | JN686530                                            | DQ667439                           |
| <i>Peronema canescens</i> Jack                                              | LA-Per        | -                                  | ●                                   | ●                                | ●                                                   | ●                                  |
| * <i>Perovskia abrotanoides</i> Kar.                                        | LA-Ne         | -                                  | -                                   | Z37429                           | -                                                   | AY506615                           |
| <i>Petitia domingensis</i> Jacq.                                            | LA-Vi         | HQ911376                           | U78697                              | U28878                           | HQ911572                                            | ●                                  |
| <i>Petraeovitex multiflora</i> (Sm.) Merr.<br>1                             | LA-Per        | ●                                  | ●                                   | ●                                | ●                                                   | ●                                  |
| * <i>Petraeovitex multiflora</i> (Sm.)<br>Merr. 2                           | LA-Per        | -                                  | KF509864                            | -                                | -                                                   | KF509878 KF509884                  |
| <i>Petraeovitex</i> sp.                                                     | LA-Per        | ●                                  | ●                                   | ●                                | ●                                                   | ●                                  |



|                                                           |            |                                                                |                                            |                                                              |                                                                |                                                                          |
|-----------------------------------------------------------|------------|----------------------------------------------------------------|--------------------------------------------|--------------------------------------------------------------|----------------------------------------------------------------|--------------------------------------------------------------------------|
| <i>*Phlomidoschema parviflorum</i><br>(Benth.) Vved.      | LA-La      | HQ911546                                                       | -                                          | -                                                            | FJ854062                                                       | FJ854293, FJ854179                                                       |
| <i>Phlomis fruticosa</i> L.                               | LA-La      | HQ911475                                                       | -                                          | HM850253                                                     | GU993105                                                       | GU993201, GU993010                                                       |
| <i>Phlomoides</i> Moench                                  | LA-La      | HQ911479<br><i>P. rotata</i> (Benth. ex<br>Hook. f.) Mathiesen | -                                          | JQ933445<br><i>P. melanantha</i> (Diels)<br>Kamelin & Makhm. | GU993145<br><i>P. rotata</i> (Benth. ex<br>Hook. f.) Mathiesen | GU993241, GU993050<br><i>P. rotata</i> (Benth. ex<br>Hook. f.) Mathiesen |
| <i>Phryma leptostachya</i> L.                             | Phrymaceae | AJ429341                                                       | AJ617586                                   | U28881                                                       | DQ532450                                                       | DQ532486                                                                 |
| <i>Phyllostegia</i> Benth.                                | LA-La      | HQ911566<br><i>P. velutina</i> (Sherff) H. St.<br>John         | -                                          | AF501991<br><i>P. macrophylla</i><br>(Gaudich.) Benth.       | HQ911635<br><i>P. velutina</i> (Sherff) H. St.<br>John         | HQ911704, HQ911775<br><i>P. velutina</i> (Sherff) H. St.<br>John         |
| <i>*Physopsis spicata</i> Turcz.                          | LA-Pro     | -                                                              | •                                          | -                                                            | -                                                              | •                                                                        |
| <i>Physostegia virginiana</i> (L.) Benth.                 | LA-La      | HQ911436                                                       | L364079                                    | L14405                                                       | HQ911602                                                       | HQ911671, HQ911738                                                       |
| <i>*Piloblephis rigida</i> (W. Bartram ex<br>Benth.) Raf. | LA-Ne      | GU381746                                                       | -                                          | -                                                            | -                                                              | GU381584                                                                 |
| <i>*Pityrodia loxocarpa</i> (F. Muell.)<br>Druce          | LA-Pro     | -                                                              | •                                          | -                                                            | -                                                              | •                                                                        |
| <i>*Platostoma kerrii</i> Suddee & A. J.<br>Paton         | LA-Ne      | -                                                              | -                                          | -                                                            | AJ505370                                                       | AJ505491                                                                 |
| <i>Plectranthus</i> L'Hér.                                | LA-Ne      | AY840166<br><i>P. fruticosus</i> L'Hér.                        | U78698<br><i>P. barbatus</i> Andrews       | U28882<br><i>P. barbatus</i> Andrews                         | AJ505378<br><i>P. barbatus</i> Andrews                         | AJ505500<br><i>P. barbatus</i> Andrews                                   |
| <i>*Pogogyne zizyphoroides</i> Benth.                     | LA-Ne      | GU381735                                                       | -                                          | -                                                            | -                                                              | GU381572                                                                 |
| <i>Pogostemon</i> Desf.                                   | LA-La      | EF529565<br><i>P. cablin</i> (Blanco) Benth.                   | U78699<br><i>P. cablin</i> (Blanco) Benth. | L14406<br><i>P. cablin</i> (Blanco) Benth.                   | HQ911592<br><i>P. benghalensis</i> (Burm.<br>f.) Kuntze        | HQ911663, HQ911731<br><i>P. benghalensis</i> (Burm.<br>f.) Kuntze        |
| <i>*Poliomintha incana</i> (Torr.) A.<br>Gray             | LA-Ne      | GU381741                                                       | -                                          | -                                                            | -                                                              | GU381578                                                                 |
| <i>Prasium majus</i> L.                                   | LA-La      | HQ911541                                                       | U78700                                     | U31459                                                       | FJ854072                                                       | FJ854300, FJ854187                                                       |
| <i>Premna aff. serratifolia</i> L.                        | LA-Pre     | •                                                              | •                                          | •                                                            | •                                                              | •                                                                        |
| <i>Premna angolensis</i> Gürke                            | LA-Pre     | •                                                              | FM200144                                   | •                                                            | •                                                              | •                                                                        |
| <i>Premna barbata</i> Wall. ex Schauer                    | LA-Pre     | •                                                              | •                                          | •                                                            | •                                                              | •                                                                        |
| <i>Premna bracteata</i> Wall. ex C. B.<br>Clarke          | LA-Pre     | •                                                              | •                                          | •                                                            | •                                                              | •                                                                        |
| <i>Premna herbacea</i> Roxb.                              | LA-Pre     | •                                                              | •                                          | •                                                            | •                                                              | •                                                                        |
| <i>Premna interrupta</i> Wall. ex Schauer                 | LA-Pre     | •                                                              | •                                          | •                                                            | •                                                              | •                                                                        |
| <i>Premna ligustroides</i> Hemsl.                         | LA-Pre     | •                                                              | •                                          | •                                                            | •                                                              | •                                                                        |
| <i>Premna menglaensis</i> B. Li                           | LA-Pre     | •                                                              | •                                          | •                                                            | •                                                              | •                                                                        |
| <i>Premna microphylla</i> Turcz.                          | LA-Pre     | HQ427331                                                       | •                                          | •                                                            | •                                                              | •                                                                        |

|                                                                       |        |                                                              |                                                         |                                                            |          |                                                              |
|-----------------------------------------------------------------------|--------|--------------------------------------------------------------|---------------------------------------------------------|------------------------------------------------------------|----------|--------------------------------------------------------------|
| <i>Premna nana</i> Collett & Hemsl.                                   | LA-Pre | ●                                                            | ●                                                       | ●                                                          | ●        | ●                                                            |
| * <i>Premna obtusifolia</i> R. Br.                                    | LA-Pre | -                                                            | ●                                                       | FJ976163                                                   | -        | ●                                                            |
| <i>Premna odorata</i> Blanco                                          | LA-Pre | HQ384494                                                     | HQ384812                                                | HQ384866                                                   | HQ385142 | HQ412925                                                     |
| <i>Premna puberula</i> Pamp.                                          | LA-Pre | ●                                                            | JQ322519                                                | JQ322526                                                   | ●        | ●                                                            |
| <i>Premna punctulata</i> C. B. Clarke                                 | LA-Pre | ●                                                            | ●                                                       | ●                                                          | ●        | ●                                                            |
| <i>Premna punicea</i> C. Y. Wu                                        | LA-Pre | ●                                                            | ●                                                       | ●                                                          | ●        | ●                                                            |
| <i>Premna resinosa</i> ( Hochst.)<br>Schauer                          | LA-Pre | -                                                            | ●                                                       | ●                                                          | -        | ●                                                            |
| <i>Premna szemaensis</i> C. Pei                                       | LA-Pre | ●                                                            | ●                                                       | ●                                                          | ●        | ●                                                            |
| <i>Premna tanganyikensis</i> Moldenke                                 | LA-Pre | -                                                            | ●                                                       | ●                                                          | -        | ●                                                            |
| <i>Premna tapintzeana</i> Dop                                         | LA-Pre | ●                                                            | ●                                                       | ●                                                          | ●        | ●                                                            |
| <i>Premna tenii</i> C. Pei                                            | LA-Pre | ●                                                            | ●                                                       | ●                                                          | ●        | ●                                                            |
| <i>Prostanthera calycina</i> F. Muell. ex<br>Benth.                   | LA-Pro | HQ384497                                                     | HQ384814                                                | HQ384867                                                   | HQ385144 | HQ412927                                                     |
| <i>Prostanthera nivea</i> A. Cunn. ex<br>Benth.                       | LA-Pro | -                                                            | ●                                                       | Z37430                                                     | AJ505403 | ●                                                            |
| <i>Prostanthera rotundifolia</i> R.Br.                                | LA-Pro | FM163283                                                     | U787021                                                 | L14008                                                     | -        | ●                                                            |
| * <i>Prunella vulgaris</i> L.                                         | LA-Ne  | FJ395426                                                     | -                                                       | Z37433                                                     | -        | DQ667508                                                     |
| <i>Pseudocarpidium ilicifolium</i> (A.<br>Rich.) Millsp.              | LA-Vi  | -                                                            | ●                                                       | -                                                          | -        | ●                                                            |
| * <i>Pseudocarpidium wrightii</i> Millsp.                             | LA-Vi  | -                                                            | -                                                       | -                                                          | -        | JQ669063                                                     |
| * <i>Pseudocaryopteris paniculata</i> (C.<br>B. Clarke) P. D. Cantino | LA-Aj  | AF477758                                                     | AY115894                                                | -                                                          | -        | -                                                            |
| * <i>Puntia stenocaulis</i> Hedge                                     | LA-Ne  | -                                                            | -                                                       | -                                                          | AJ505424 | AJ505545                                                     |
| * <i>Pycnanthemum tenuifolium</i><br>Schrاد.                          | LA-Ne  | GU381750                                                     | -                                                       | -                                                          | -        | GU381589                                                     |
| <i>Pycnostachys reticulata</i> (E. Mey.)<br>Benth.                    | LA-Ne  | JF270910                                                     | -                                                       | JF265567                                                   | AJ505395 | AJ505516                                                     |
| <i>Rosmarinus officinalis</i> L.                                      | LA-Ne  | FR719113                                                     | -                                                       | Z37435                                                     | AJ505425 | AY570465                                                     |
| <i>Rostrinucula dependens</i> (Rehder)<br>Kudô                        | LA-La  | HQ911405                                                     | ●                                                       | -                                                          | FJ854074 | FJ854302, FJ854189                                           |
| <i>Rotheca</i> Raf.                                                   | LA-Aj  | JX517676<br><i>R. myricoides</i> (Hochst.)<br>Steane & Mabb. | L49158<br><i>R. incisa</i> (Klotzsch)<br>Steane & Mabb. | U78713<br><i>R. myricoides</i> (Hochst.)<br>Steane & Mabb. | -        | FJ952081<br><i>R. myricoides</i> (Hochst.)<br>Steane & Mabb. |
| <i>Rubiteucris palmata</i> (Benth. ex<br>Hook. f.) Kudô               | LA-Aj  | AF477764                                                     | AY115883                                                | -                                                          | -        | JN575438                                                     |

|                                                           |       |                                               |                                                          |                                          |                                       |                                                 |
|-----------------------------------------------------------|-------|-----------------------------------------------|----------------------------------------------------------|------------------------------------------|---------------------------------------|-------------------------------------------------|
| * <i>Saccocalyx saturejoides</i> Coss. & Durand           | LA-Ne | GU381796                                      | -                                                        | -                                        | -                                     | GU381641                                        |
| <i>Salvia miltiorrhiza</i> Bunge                          | LA-Ne | JX312195                                      | JX312195                                                 | JX312195                                 | JX312195                              | JX312195                                        |
| * <i>Satureja montana</i> L.                              | LA-Ne | AY840167                                      | -                                                        | Z37455                                   | -                                     | AY840179                                        |
| * <i>Schizonepeta tenuifolia</i> (Benth.) Briq.           | LA-Ne | -                                             | -                                                        | FJ513155                                 | -                                     | EU186386                                        |
| * <i>Schnabelia</i> Hand.-Mazz.                           | LA-Aj | AF315296<br><i>S. oligophylla</i> Hand.-Mazz. | AY115893<br><i>S. nepetifolia</i> (Benth.) P. D. Cantino | -                                        | -                                     | -                                               |
| <i>Scutellaria</i> L.                                     | LA-Sc | HQ911383<br><i>S. indica</i> L.               | JQ322522<br><i>S. indica</i> L.                          | Z37457<br><i>S. alpina</i> L.            | EU138289<br><i>S. hirta</i> Sm.       | EF546928, EF546848<br><i>S. hirta</i> Sm.       |
| <i>Sideritis syriaca</i> L.                               | LA-La | HQ911543                                      | -                                                        | AF501999                                 | FJ854082                              | FJ854304, FJ854198                              |
| * <i>Spartothamnella teucriflora</i> (F. Muell.) Moldenke | LA-Aj | -                                             | AY310133                                                 | -                                        | -                                     | •                                               |
| * <i>Sphenodesme mollis</i> Craib                         | LA-Sy | -                                             | FM200155                                                 | -                                        | -                                     | -                                               |
| <i>Sphenodesme</i> sp.                                    | LA-Sy | •                                             | •                                                        | •                                        | •                                     | •                                               |
| * <i>Stachyopsis oblongata</i> (Schrenk) Popov & Vved.    | LA-La | HQ911463                                      | -                                                        | -                                        | HQ911616                              | HQ911686, HQ911757                              |
| <i>Stachys cretica</i> L.                                 | LA-La | HQ911554                                      | -                                                        | HQ902776                                 | FJ854100                              | FJ854316, FJ854215                              |
| <i>Stenogyne</i> Benth.                                   | LA-La | HQ911567<br><i>S. sessilis</i> Benth.         | -                                                        | AF502024<br><i>S. microphylla</i> Benth. | HQ911636<br><i>S. sessilis</i> Benth. | HQ911705, HQ911776<br><i>S. sessilis</i> Benth. |
| * <i>Suzukia</i> Kudô                                     | LA-La | HQ911562<br><i>S. shikikunensis</i> Kudô      | -                                                        | -                                        | KF529765<br><i>T. luchuensis</i> Kudô | FJ854331, FJ854237<br><i>T. luchuensis</i> Kudô |
| <i>Symphorema</i> sp.                                     | LA-Sy | •                                             | •                                                        | •                                        | •                                     | •                                               |
| * <i>Synandra hispidula</i> (Michx.) Baill.               | LA-La | HQ911427                                      | -                                                        | -                                        | HQ911597                              | HQ911670, HQ911737                              |
| * <i>Syncolostemon rotundifolius</i> E. Mey. ex Benth.    | LA-Ne | JF357832                                      | -                                                        | -                                        | AJ505402                              | AJ505523                                        |
| <i>Tectona grandis</i> L. 1                               | LA    | •                                             | •                                                        | •                                        | •                                     | •                                               |
| <i>Tectona grandis</i> L. 2                               | LA    | •                                             | •                                                        | •                                        | •                                     | •                                               |
| <i>Tectona grandis</i> L. 3                               | LA    | •                                             | •                                                        | •                                        | •                                     | •                                               |
| <i>Tectona grandis</i> L. 4                               | LA    | •                                             | •                                                        | •                                        | •                                     | •                                               |
| <i>Tectona grandis</i> L. 5                               | LA    | NC_020098                                     | NC_020098                                                | NC_020098                                | NC_020098                             | NC_020098                                       |
| <i>Tectona grandis</i> L. 6                               | LA    | HF567869                                      | HF567869                                                 | HF567869                                 | HF567869                              | HF567869                                        |
| * <i>Teijsmanniodendron bogoriense</i> Koord.             | LA-Vi | -                                             | FM200148                                                 | JF738613                                 | -                                     | -                                               |
| * <i>Teijsmanniodendron hollrungii</i>                    | LA-Vi | -                                             | •                                                        | -                                        | -                                     | •                                               |

|                                                     |       |                                              |                                      |                                              |                                           |                                                     |
|-----------------------------------------------------|-------|----------------------------------------------|--------------------------------------|----------------------------------------------|-------------------------------------------|-----------------------------------------------------|
| (Warb.) Kosterm.                                    |       |                                              |                                      |                                              |                                           |                                                     |
| * <i>Teijsmanniodendron pteropodum</i> (Miq.) Bakh. | LA-Vi | -                                            | FM200149                             | -                                            | -                                         | -                                                   |
| * <i>Teijsmanniodendron simplicifolium</i> Merr.    | LA-Vi | -                                            | FM200150                             | -                                            | -                                         | -                                                   |
| <i>Tetraclea coulteri</i> A. Gray                   | LA-Aj | -                                            | AF130147                             | U78714                                       | JN686533                                  | FJ952068                                            |
| <i>Tetradenia</i> Benth.                            | LA-Ne | JF270969<br><i>T. riparia</i> (Hochst.) Codd | -                                    | JF265627<br><i>T. riparia</i> (Hochst.) Codd | AJ505399<br><i>T. nervosa</i> Codd        | AJ505520<br><i>T. nervosa</i> Codd                  |
| <i>Teucrium parvifolium</i> Hook. f.                | LA-Aj | -                                            | U78684                               | U78715                                       | -                                         | JN408674                                            |
| <i>Teucrium</i> L.                                  | LA-Aj | HQ911378<br><i>T. scorodonia</i> L.          | AY115885<br><i>T. canadense</i> L.   | Z37468<br><i>T. scorodonia</i> L.            | FJ853996<br><i>T. scorodonia</i> L.       | JF694847<br><i>T. scorodonia</i> L.                 |
| * <i>Thorncroftia media</i> Codd                    | LA-Ne | -                                            | -                                    | -                                            | AJ505400                                  | AJ505522                                            |
| * <i>Thymbra spicata</i> L.                         | LA-Ne | GU381788                                     | -                                    | HQ902798                                     | -                                         | GU381632                                            |
| <i>Thymus</i> L.                                    | LA-Ne | AY840173<br><i>T. serpyllum</i> L.           | -                                    | Z37472<br><i>T. vulgaris</i> L.              | AJ505423<br><i>T. serpyllum</i> L.        | AY570502<br><i>T. serpyllum</i> L.                  |
| * <i>Thuspeinanta persica</i> (Boiss.) Briq.        | LA-La | HQ911550                                     | -                                    | -                                            | FJ854126                                  | FJ854334, FJ854240                                  |
| <i>Tinnea</i> Kotschy & Peyr.                       | LA-Sc | HQ911385<br><i>T. rhodesiana</i> S. Moore    | U78709<br><i>T. zambesiaca</i> Baker | U28886<br><i>T. zambesiaca</i> Baker         | HQ911582<br><i>T. rhodesiana</i> S. Moore | HQ911652, HQ911721<br><i>T. rhodesiana</i> S. Moore |
| <i>Trichostema dichotomum</i> L.                    | LA-Aj | AF336235                                     | U78682                               | U28887                                       | -                                         | ●                                                   |
| <i>Vitex agnus-castus</i> L. 1                      | LA-Vi | ●                                            | ●                                    | ●                                            | ●                                         | ●                                                   |
| <i>Vitex agnus-castus</i> L. 2                      | LA-Vi | AB284182                                     | U78707                               | U78716                                       | HQ385143                                  | HQ412926                                            |
| <i>Vitex axillariflora</i> (Merr.) Bramley          | LA-Vi | ●                                            | FM200151                             | ●                                            | ●                                         | ●                                                   |
| <i>Vitex buchananii</i> Baker ex Gürke              | LA-Vi | JX517569                                     | ●                                    | JX573083                                     | -                                         | ●                                                   |
| * <i>Vitex glabrata</i> R.Br.                       | LA-Vi | AB284178                                     | FM200159                             | -                                            | -                                         | -                                                   |
| * <i>Vitex guanahacabensis</i> Borhidi              | LA-Vi | -                                            | ●                                    | -                                            | -                                         | ●                                                   |
| * <i>Vitex lignum-vitae</i> A. Cunn. ex Schauer     | LA-Vi | -                                            | ●                                    | -                                            | -                                         | ●                                                   |
| * <i>Vitex megapotamica</i> (Spreng.) Moldenke      | LA-Vi | -                                            | ●                                    | -                                            | -                                         | -                                                   |
| <i>Vitex negundo</i> L.                             | LA-Vi | AB284176                                     | JQ322520                             | JQ322525                                     | -                                         | DQ304786                                            |
| <i>Vitex pinnata</i> L.                             | LA-Vi | AF315305                                     | FM200169                             | ●                                            | -                                         | -                                                   |
| <i>Vitex queenslandica</i> (Munir)                  | LA-Vi | ●                                            | FM200177                             | ●                                            | ●                                         | ●                                                   |

| <i>Bramley</i>                                                                |        |                                    |                                    |                                         |                                    |                                    |
|-------------------------------------------------------------------------------|--------|------------------------------------|------------------------------------|-----------------------------------------|------------------------------------|------------------------------------|
| <i>Vitex thailandica</i> Bramley                                              | LA-Vi  | -                                  | FM200141                           | •                                       | •                                  | •                                  |
| <i>Vitex trifolia</i> L.                                                      | LA-Vi  | AB284175                           | FM200171                           | GQ436526                                | AJ505416                           | AJ505539                           |
| <i>Vitex trifolia</i> subsp. <i>litoralis</i> Steenis                         | LA-Vi  | AB284177                           | •                                  | -                                       | -                                  | •                                  |
| <i>Vitex turczaninowii</i> Merr.                                              | LA-Vi  | •                                  | FM200176                           | •                                       | •                                  | •                                  |
| * <i>Warnockia</i> <i>scutellarioides</i><br>(Engelm. & A. Gray) M. W. Turner | LA-La  | HQ911430                           | -                                  | -                                       | HQ911599                           | EF546971, EF546895                 |
| <i>Wenchengia alternifolia</i> C. Y. Wu<br>& S. Chow                          | LA-Sc  | •                                  | JQ322523                           | JQ322528                                | JX893281                           | JX893310, JX893339                 |
| <i>Westringia</i> Sm.                                                         | LA-Pro | HQ911373<br><i>W. rigida</i> R.Br. | GQ381197<br><i>W. rigida</i> R.Br. | Z37474<br><i>W. rosmariniformis</i> Sm. | HQ911569<br><i>W. rigida</i> R.Br. | HQ911707<br><i>W. rigida</i> R.Br. |
| * <i>Zataria multiflora</i> Boiss.                                            | LA-Ne  | GU381782                           | -                                  | -                                       | -                                  | GU381626                           |
| * <i>Ziziphora taurica</i> M. Bieb.                                           | LA-Ne  | GU381673                           | -                                  | HQ902813                                | -                                  | DQ667501                           |

**Supplementary Table S2.** Information about PCR amplification primers for *matK*, *ndhF*, *rbcL*, *rps16* and *trnL-F* regions.

| Markers       | Primer name | Sequences (5'→3')           | References                          |
|---------------|-------------|-----------------------------|-------------------------------------|
| <i>matK</i>   | 323f        | ATTNTCAAATCNTAKCAGAGGGG     | Andersson <sup>3</sup>              |
|               | 1189r       | TACNATCAATTCATTCAATATTYCC   | Andersson <sup>3</sup>              |
| <i>ndhF</i>   | ndh972F     | GTCTCAATTGGGTTATATGATG      | Olmstead and Sweere <sup>4</sup>    |
|               | ndh#2112R   | CCCYASATATTTGATACCTTCKCC    | Olmstead and Reeves <sup>5</sup>    |
| <i>rbcL</i>   | rbcL aF     | ATGTCACCACAAACAGAGACT AAAGC | Hasebe <i>et al.</i> <sup>6</sup>   |
|               | rbcL cR     | GCAGCAGCTAGTTCCGGGCTCCA     | Hasebe <i>et al.</i> <sup>6</sup>   |
| <i>rps16</i>  | rpsF        | GTGGTAGAAAGCAACGTGCGACTT    | Oxelman <i>et al.</i> <sup>7</sup>  |
|               | rpsR2R      | TCGGGATCGAACATCAATTGCAAC    | Oxelman <i>et al.</i> <sup>7</sup>  |
| <i>trnL-F</i> | c           | CGAAATCGGTAGACGCTACG        | Taberlet <i>et al.</i> <sup>8</sup> |
|               | f           | ATTTGAACTGGTGACACGAG        | Taberlet <i>et al.</i> <sup>8</sup> |

## Supplementary Figures

**Fig. S1.** Strict consensus tree resulted from MP analysis based on *matK* sequence with gaps treated as simple indels (L = 2384 CI = 0.53 RI = 0.87). The topology of the optimal ML tree was congruent with the MP tree. Numbers above branches indicated bootstrap support values  $\geq 50\%$  in MP and ML analysis, respectively. Multiple accessions of the same species are numbered according to Supplementary Table S1. Subfamilies and tribes recognized by Olmstead<sup>2</sup> were covered by gray boxes, and genera without certain subfamilial placement at present were marked in red font.

**Fig. S2.** Strict consensus tree resulted from MP analysis based on *ndhF* sequence with gaps treated as simple indels (L = 3891 CI = 0.43 RI = 0.75). Notations as in Fig. S1.

**Fig. S3.** Strict consensus tree resulted from MP analysis based on *rbcL* sequence with gaps treated as simple indels (L = 1445 CI = 0.32 RI = 0.73). Notations as in Fig. S1.

**Fig. S4.** Strict consensus tree resulted from MP analysis based on *rps16* sequence with gaps treated as simple indels (L = 1757 CI = 0.51 RI = 0.84). Notations as in Fig. S1.

**Fig. S5.** Strict consensus tree resulted from MP analysis based on *trnL-F* sequence with gaps treated as simple indels (L = 1662 CI = 0.47 RI = 0.86). Notations as in Fig. S1.

**Fig. S6.** MP strict consensus tree from the analysis of the combined cpDNA (*matK* + *ndhF* + *rbcL* + *rps16* + *trnL-F*) dataset D270 with gaps treated as simple indels (L = 11084 CI = 0.47 RI = 0.83). Bootstrap support values  $\geq 50\%$  are marked above branches. Multiple accessions of the same species are numbered according to Supplementary Table S1. A single generic name represented that the combined sequences pooled from different species of the genus. Subfamilies and tribes recognized by Olmstead<sup>2</sup> were covered by gray boxes with different grey level, while new subfamilies (Cymarioideae, Peronematoideae, and Premnoideae) and clades (*Callicarpa*, and *Tectona*) proposed in this study were covered by pink boxes and marked in red bold font.

**Fig. S7.** Optimal ML tree from the analysis of the combined cpDNA (*matK* + *ndhF* + *rbcL* + *rps16* + *trnL-F*) dataset D270 with gaps treated as simple indels. Bootstrap support values  $\geq 50\%$  are marked above branches. Notations as in Fig. S6.

**Fig. S8.** 50% majority-rule consensus tree from the BI analysis of the combined cpDNA (*matK* +

*ndhF + rbcL + rps16 + trnL-F*) dataset D270 with gaps treated as simple indels. Posterior probabilities values  $\geq 0.90$  are marked above branches. Notations as in Fig. S6.

**Fig. S9.** MP strict consensus tree from the analysis of the combined cpDNA (*matK + ndhF + rbcL + rps16 + trnL-F*) dataset D270 with gaps treated as missing data. Bootstrap support values  $\geq 50\%$  are marked above branches. Notations as in Fig. S6.

**Fig. S10.** Optimal ML tree from the analysis of the combined cpDNA (*matK + ndhF + rbcL + rps16 + trnL-F*) dataset D270 with gaps treated as missing data. Bootstrap support values  $\geq 50\%$  are marked above branches. Notations as in Fig. S6.

**Fig. S11.** 50% majority-rule consensus tree from the BI analysis of the combined cpDNA (*matK + ndhF + rbcL + rps16 + trnL-F*) dataset D270 with gaps treated as missing data. Posterior probabilities values  $\geq 0.90$  are marked above branches. Notations as in Fig. S6.

**Fig. S12.** The Bayesian 50% majority-rule consensus phylogram based on combined cpDNA (*matK + ndhF + rbcL + rps16 + trnL-F*) dataset D155 with gaps treated as missing data. The topology of the ML and MP trees were congruent with the BI tree. Support values displayed on the branches follow the order BI-PP/ML-BS/MP-BS (“-” indicates support values of less than 0.90 in BI or 50% in ML and MP analyses, respectively). The bold lines indicate the three support values get full scores simultaneously. Multiple accessions of the same species are numbered according to Supplementary Table S1. A single generic name represented that the combined sequences pooled from different species of the genus. Subfamilies and tribes recognized by Olmstead<sup>2</sup> were covered by gray boxes with different grey level, while new subfamilies (Cymarioideae, Peronematoideae, and Premnoideae) and clades (*Callicarpa*, and *Tectona*) proposed in this study were covered by pink boxes and marked in red bold font.

## References

1. Harley, R. M. *et al.* in *Families and genera of vascular plants*, Vol. 7 (eds Kubitzki, K. & Kadereit, J. W.), Labiatae, 167–275 (Springer, Berlin, 2004).
2. Olmstead, R. G. 2012. *A synoptical classification of the Lamiales, version 2.4* (2012) Available at: <http://depts.washington.edu/phylo/Classification.pdf>. (Accessed: 5th April 2013).
3. Andersson, S. On the phylogeny of the genus *Calceolaria* (Calceolariaceae) as inferred from ITS and plastid *matK* sequences. *Taxon* **55**, 125–137 (2006).



4. Olmstead, R. G. & Sweere, J. A. Combining data in phylogenetic systematics: an empirical approach using three molecular data sets in the Solanaceae. *Syst. Biol.* **43**, 467–481 (1994).
5. Olmstead, R. G. & Reeves, P. A. Evidence for the polyphyly of the Scrophulariaceae based on chloroplast *rbcL* and *ndhF* sequences. *Ann. Missouri Bot. Gard.* **82**, 176–193 (1995).
6. Hasebe, M., Omori, T., Nakazawa, M., Sano, T., Kato, M. & Iwatsuki, K. *RbcL* gene sequences provide evidence for the evolutionary lineages of leptosporangiate ferns. *Proc. Nat. Acad. Sci.* **91**, 5730–5734 (1994).
7. Oxelman, B., Liden, M. & Berglund, D. Chloroplast *rps16* intron phylogeny of the tribe Sileneae (Caryophyllaceae). *Pl. Syst. Evol.* **206**, 393–410 (1997).
8. Taberlet, P., Gielly, L., Pautou, G. & Bouvet, J. 1991. Universal primers for amplification of three non-coding regions of chloroplast DNA. *Pl. Molec. Biol.* **17**, 1105–1109.

Supplementary Fig. S1

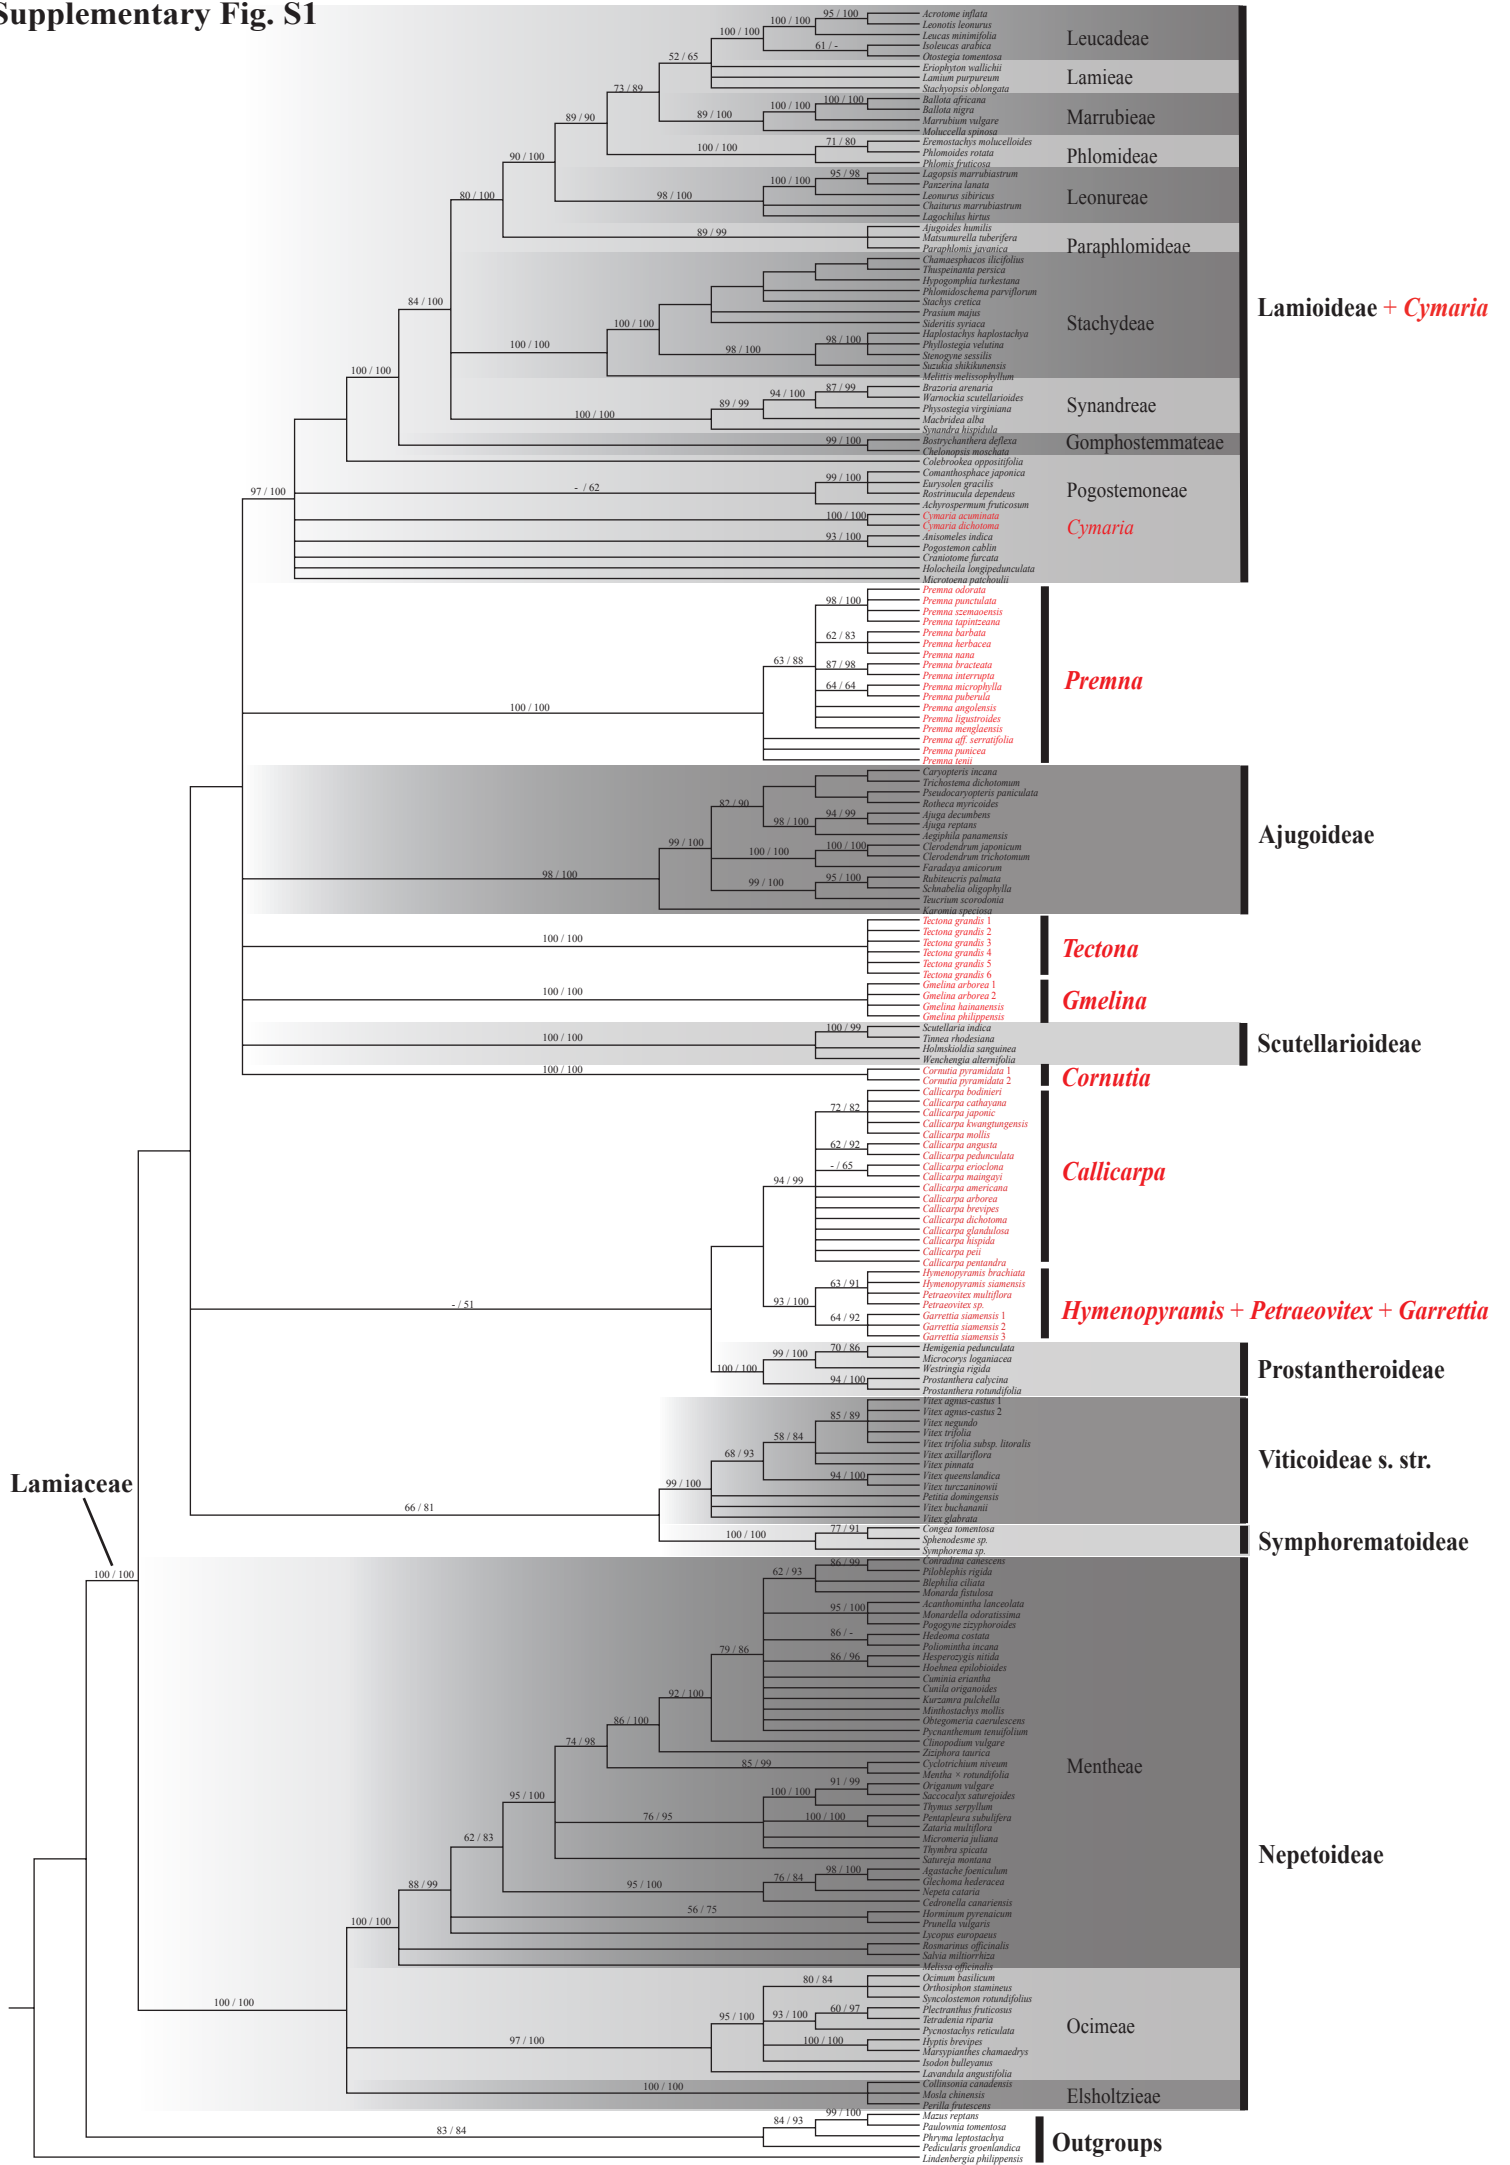

Supplementary Fig. S2

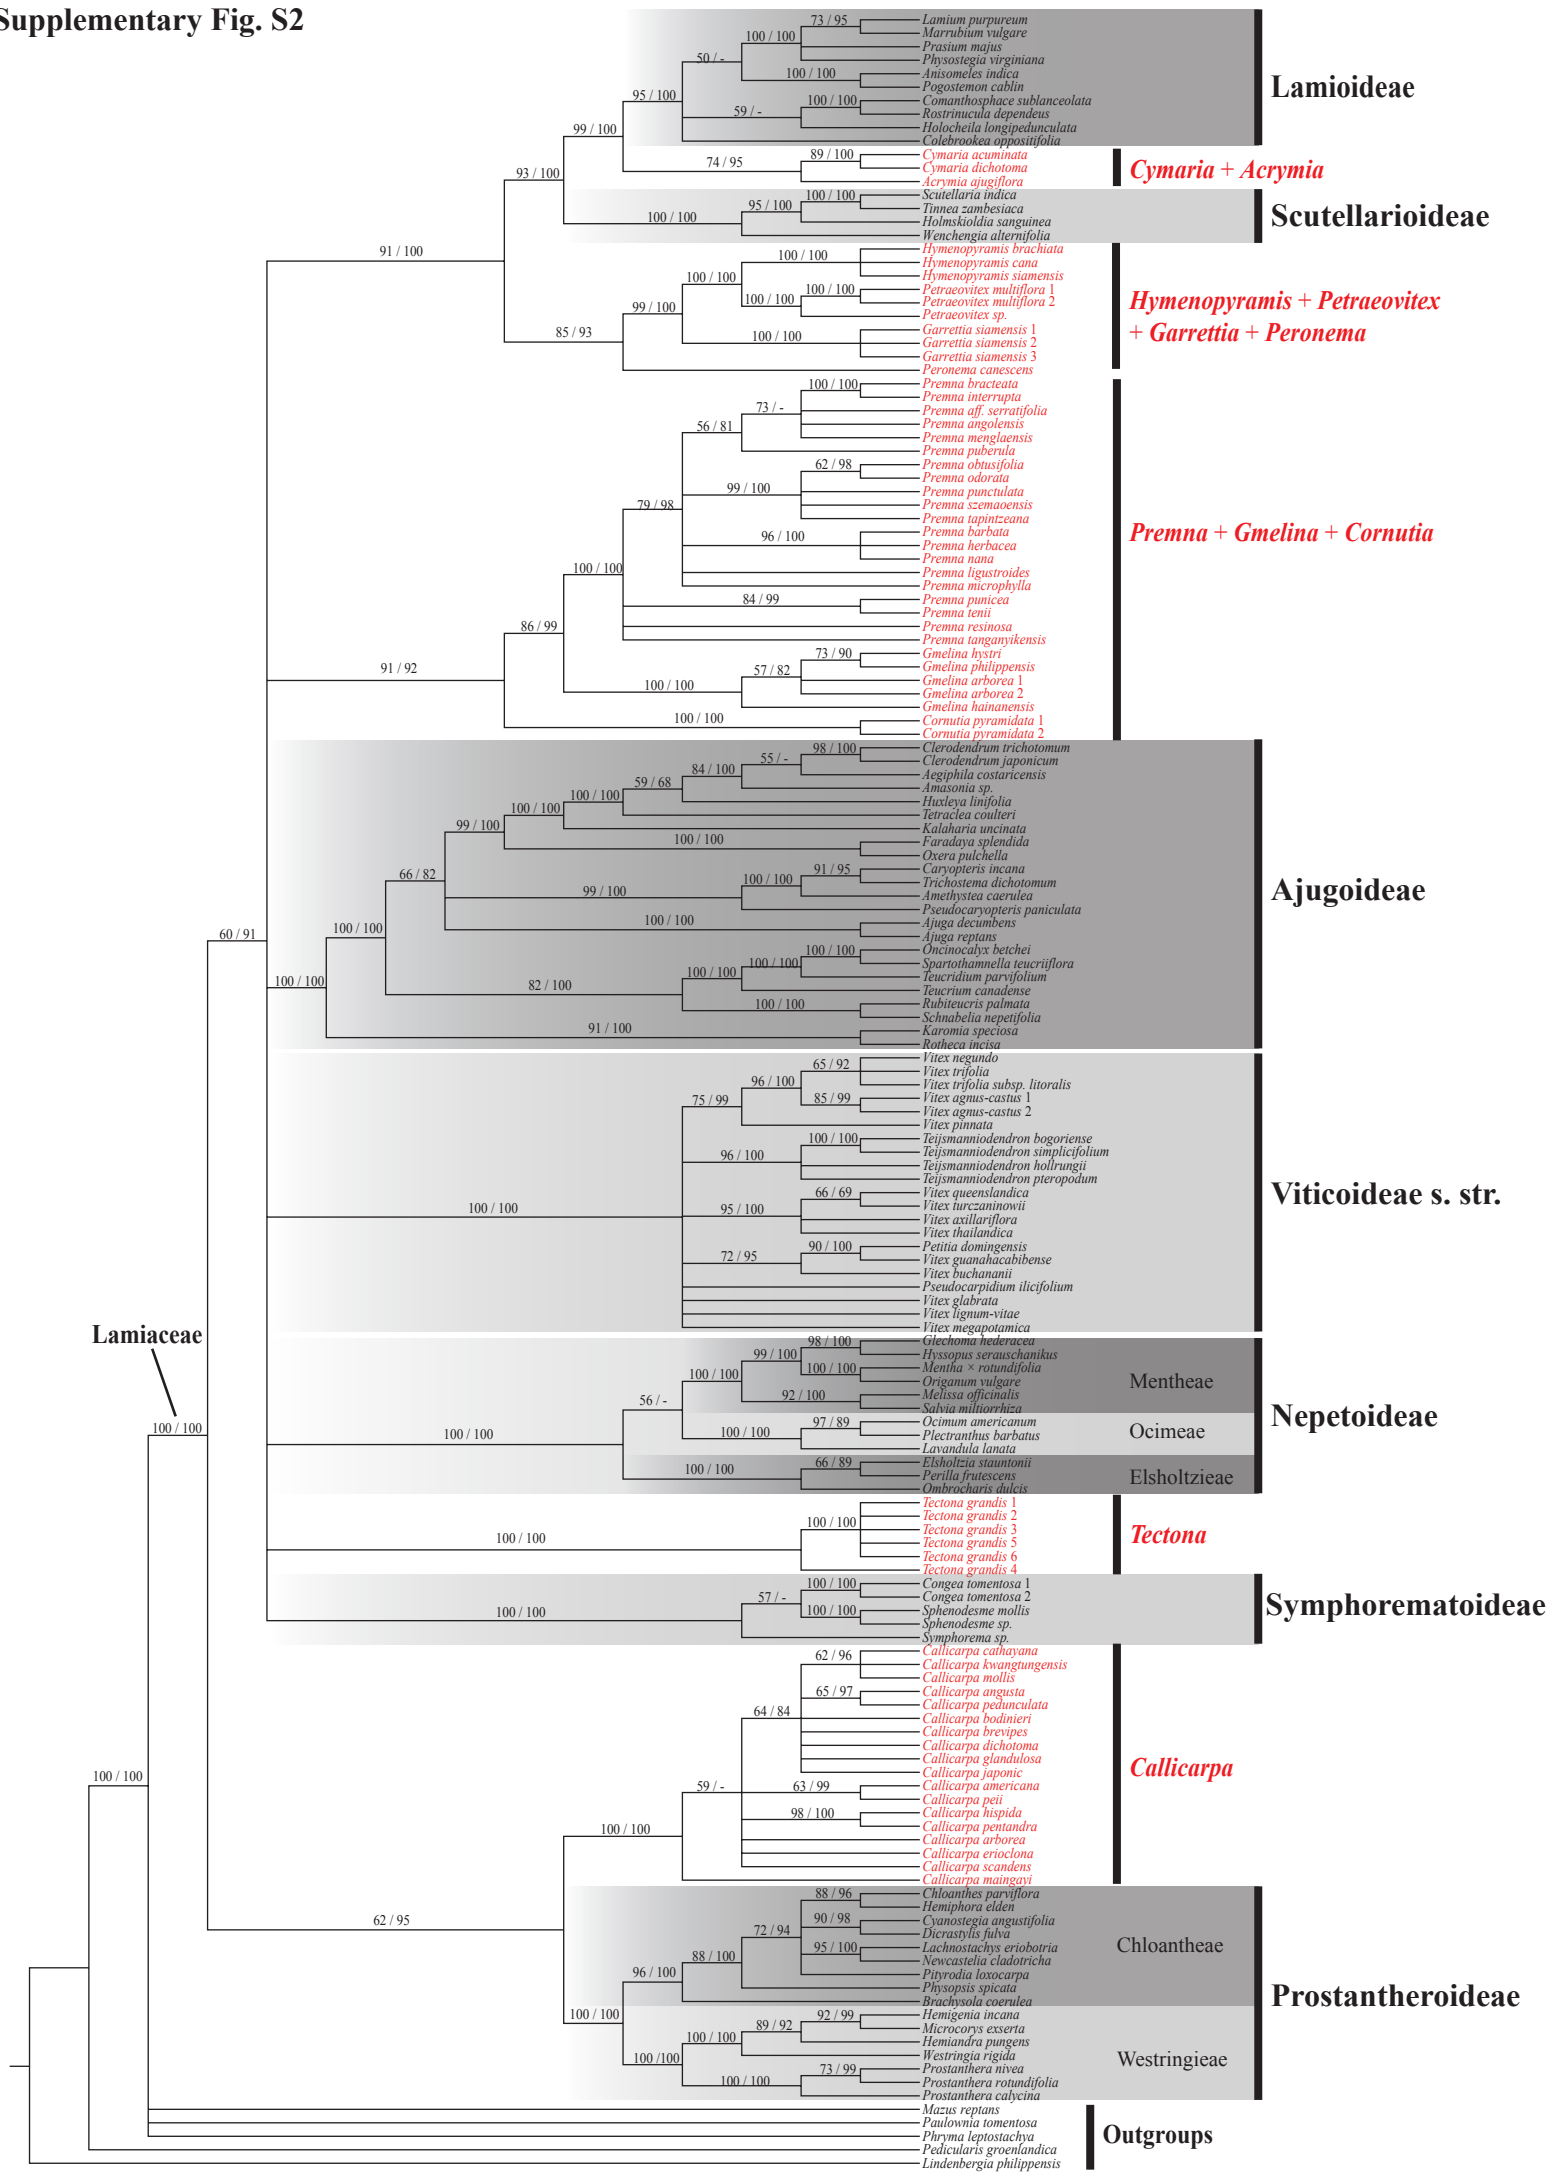

Supplementary Fig. S3

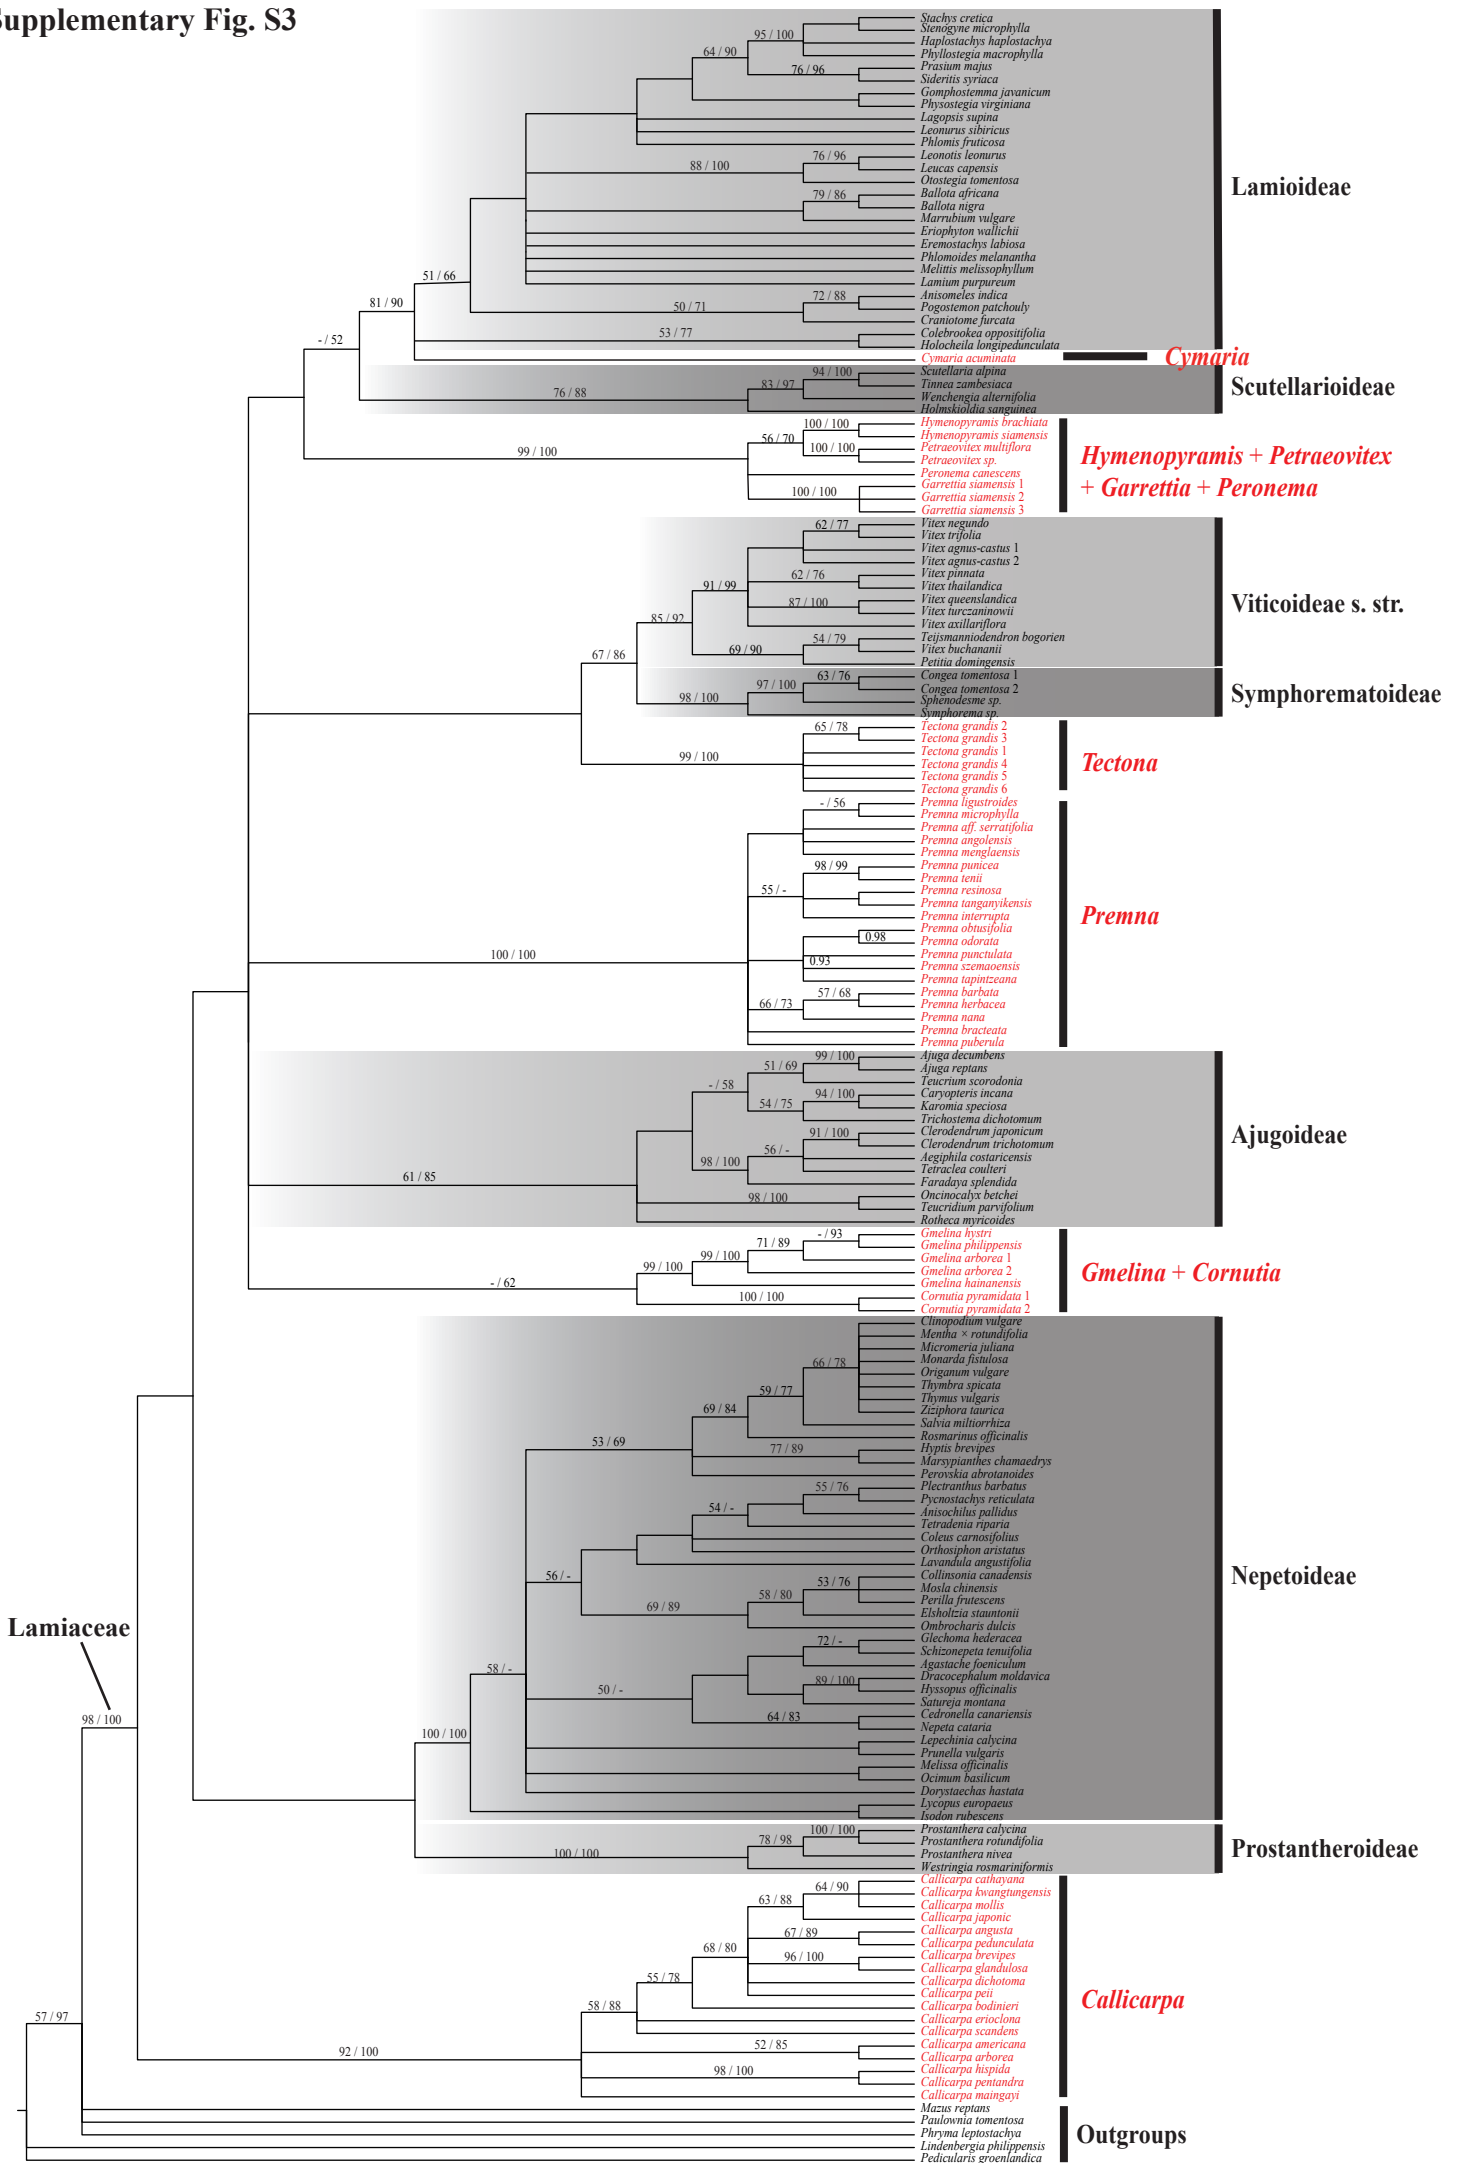

Supplementary Fig. S4

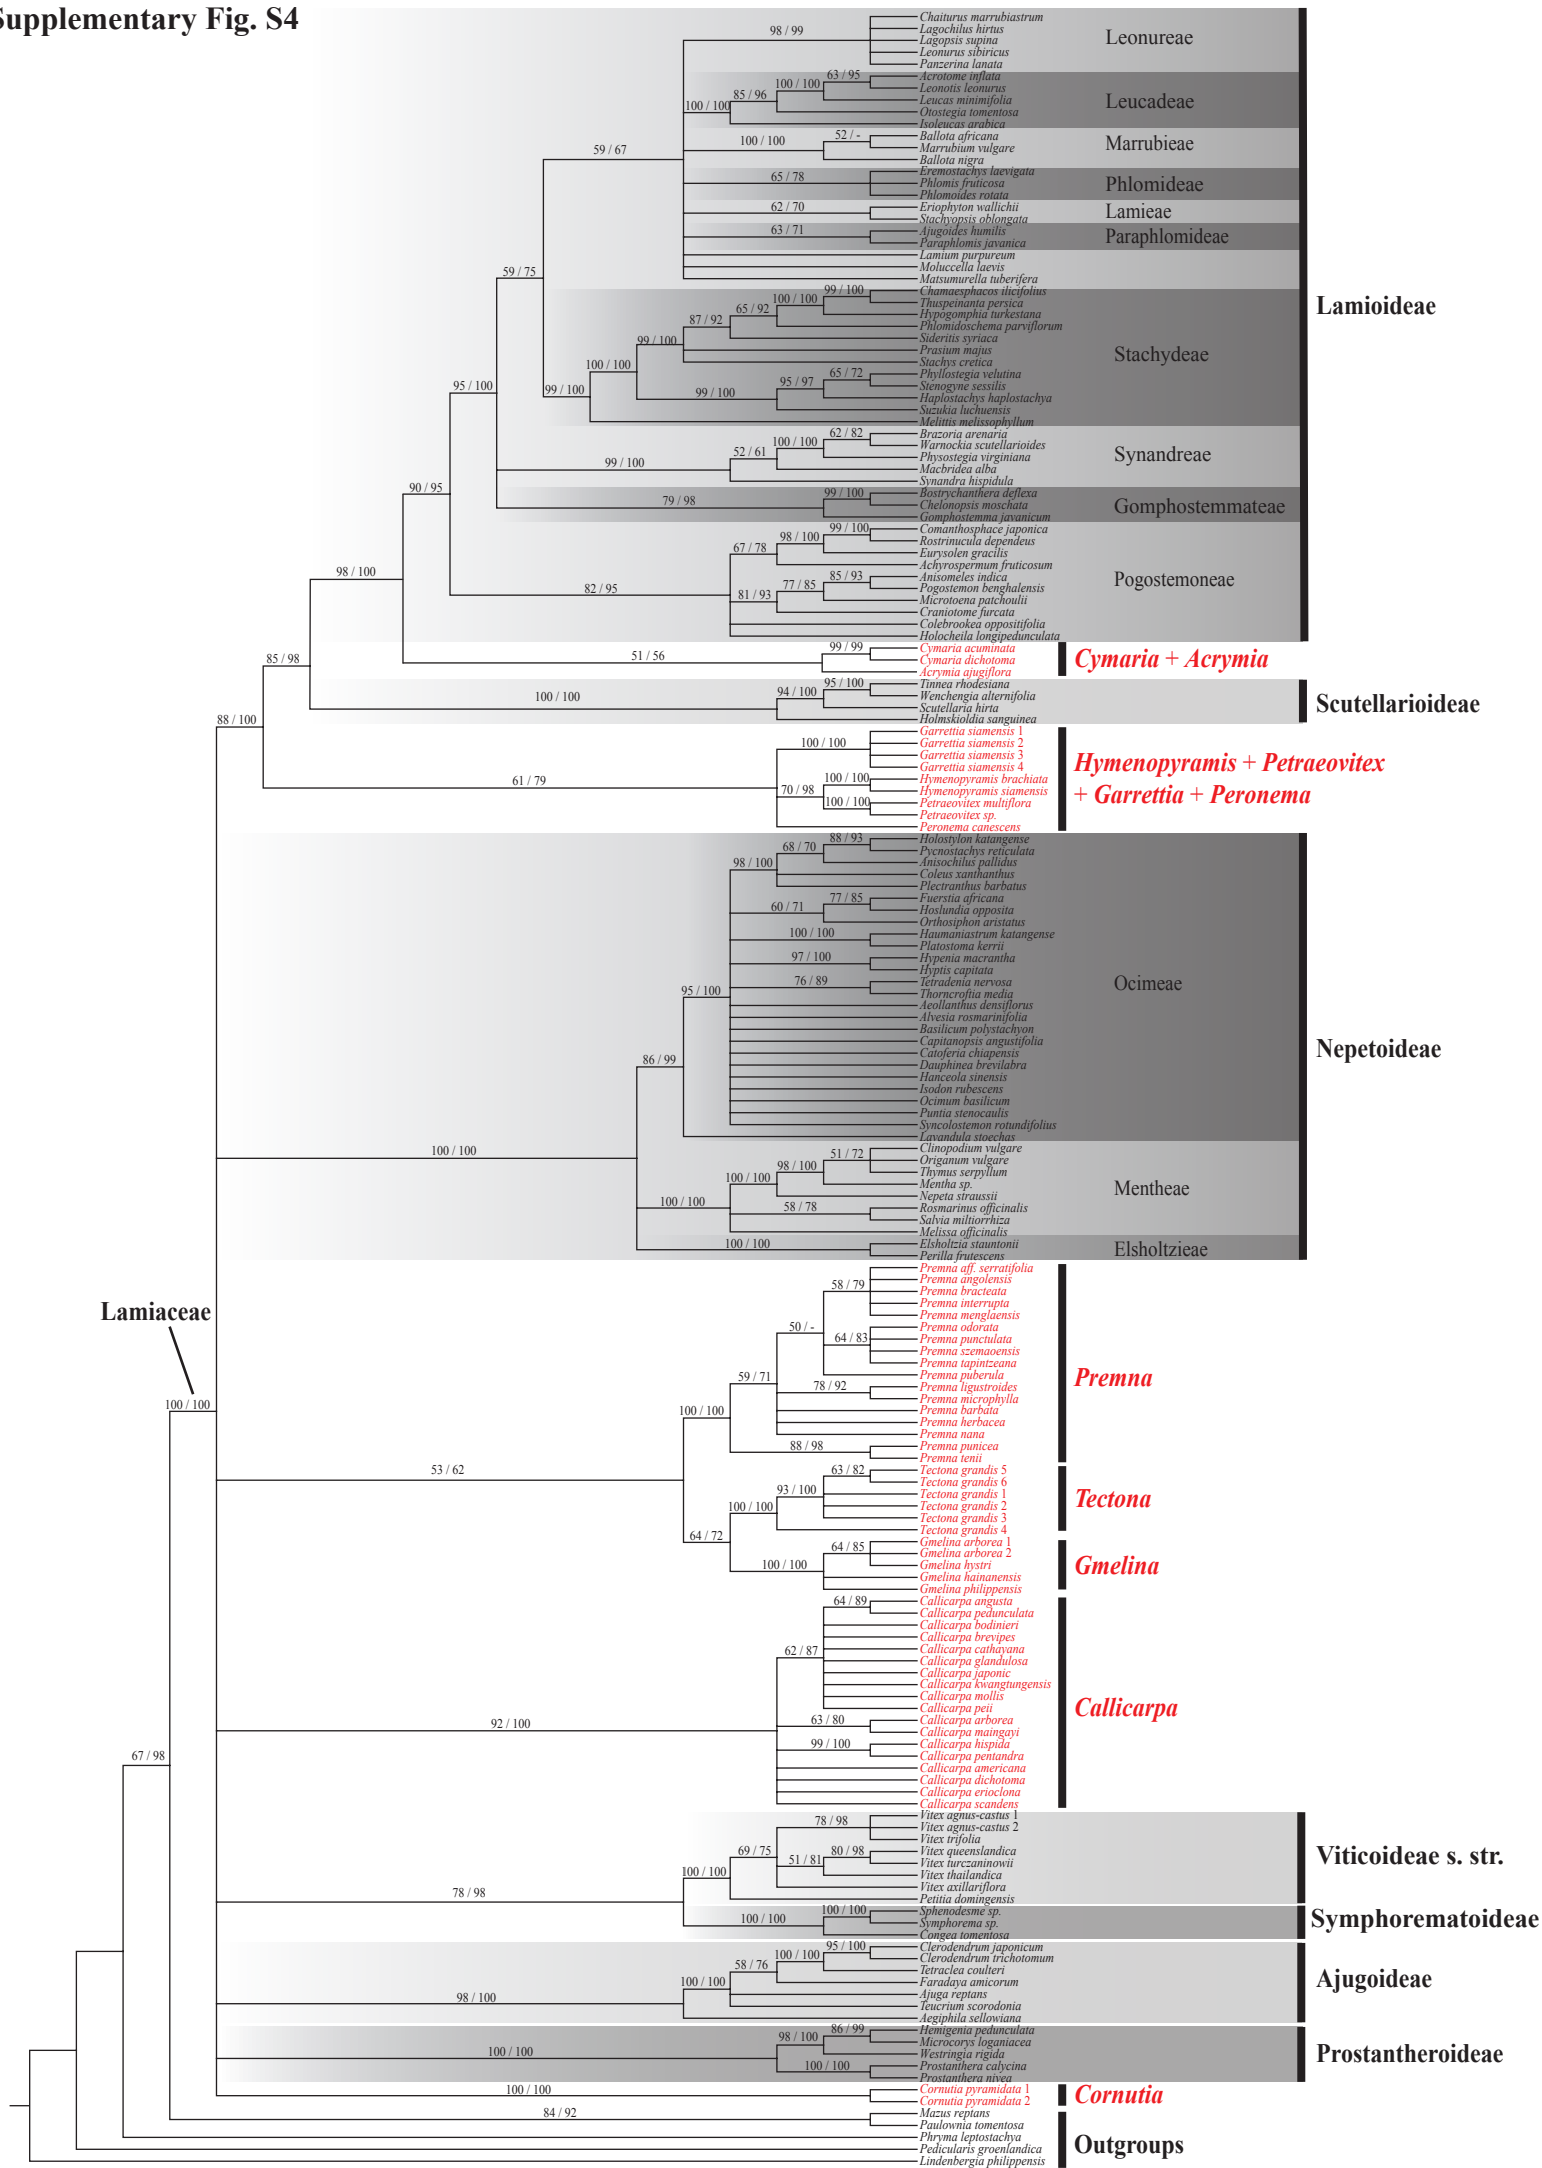

Supplementary Fig. S5

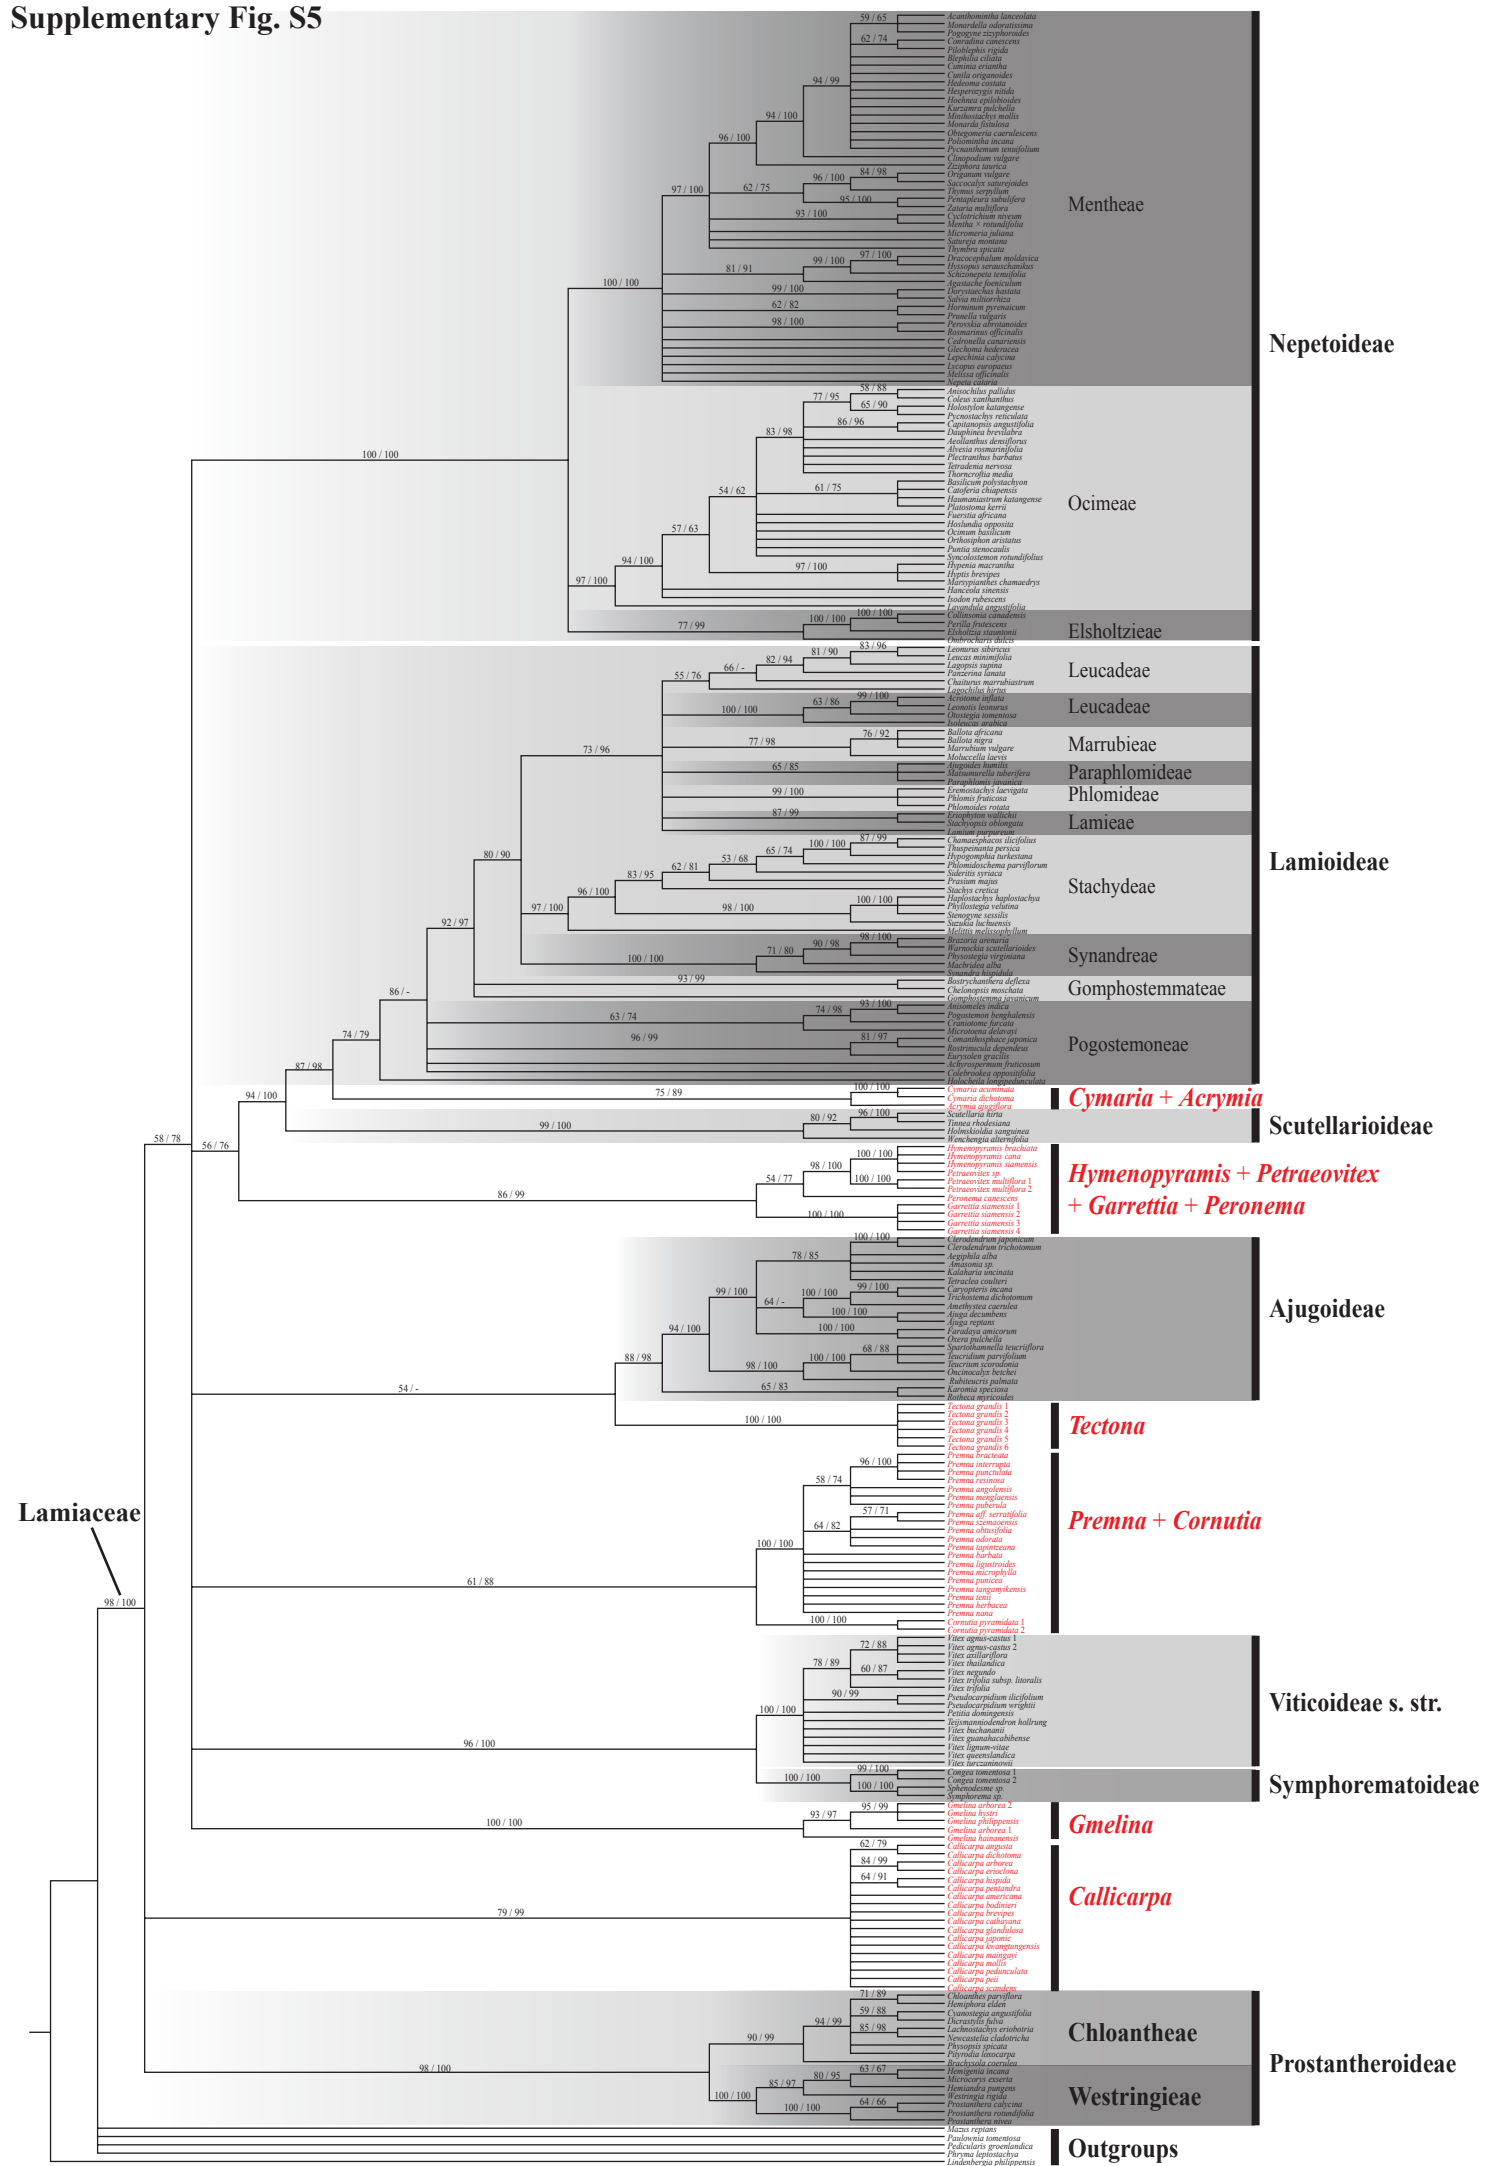

Supplementary Fig. S6

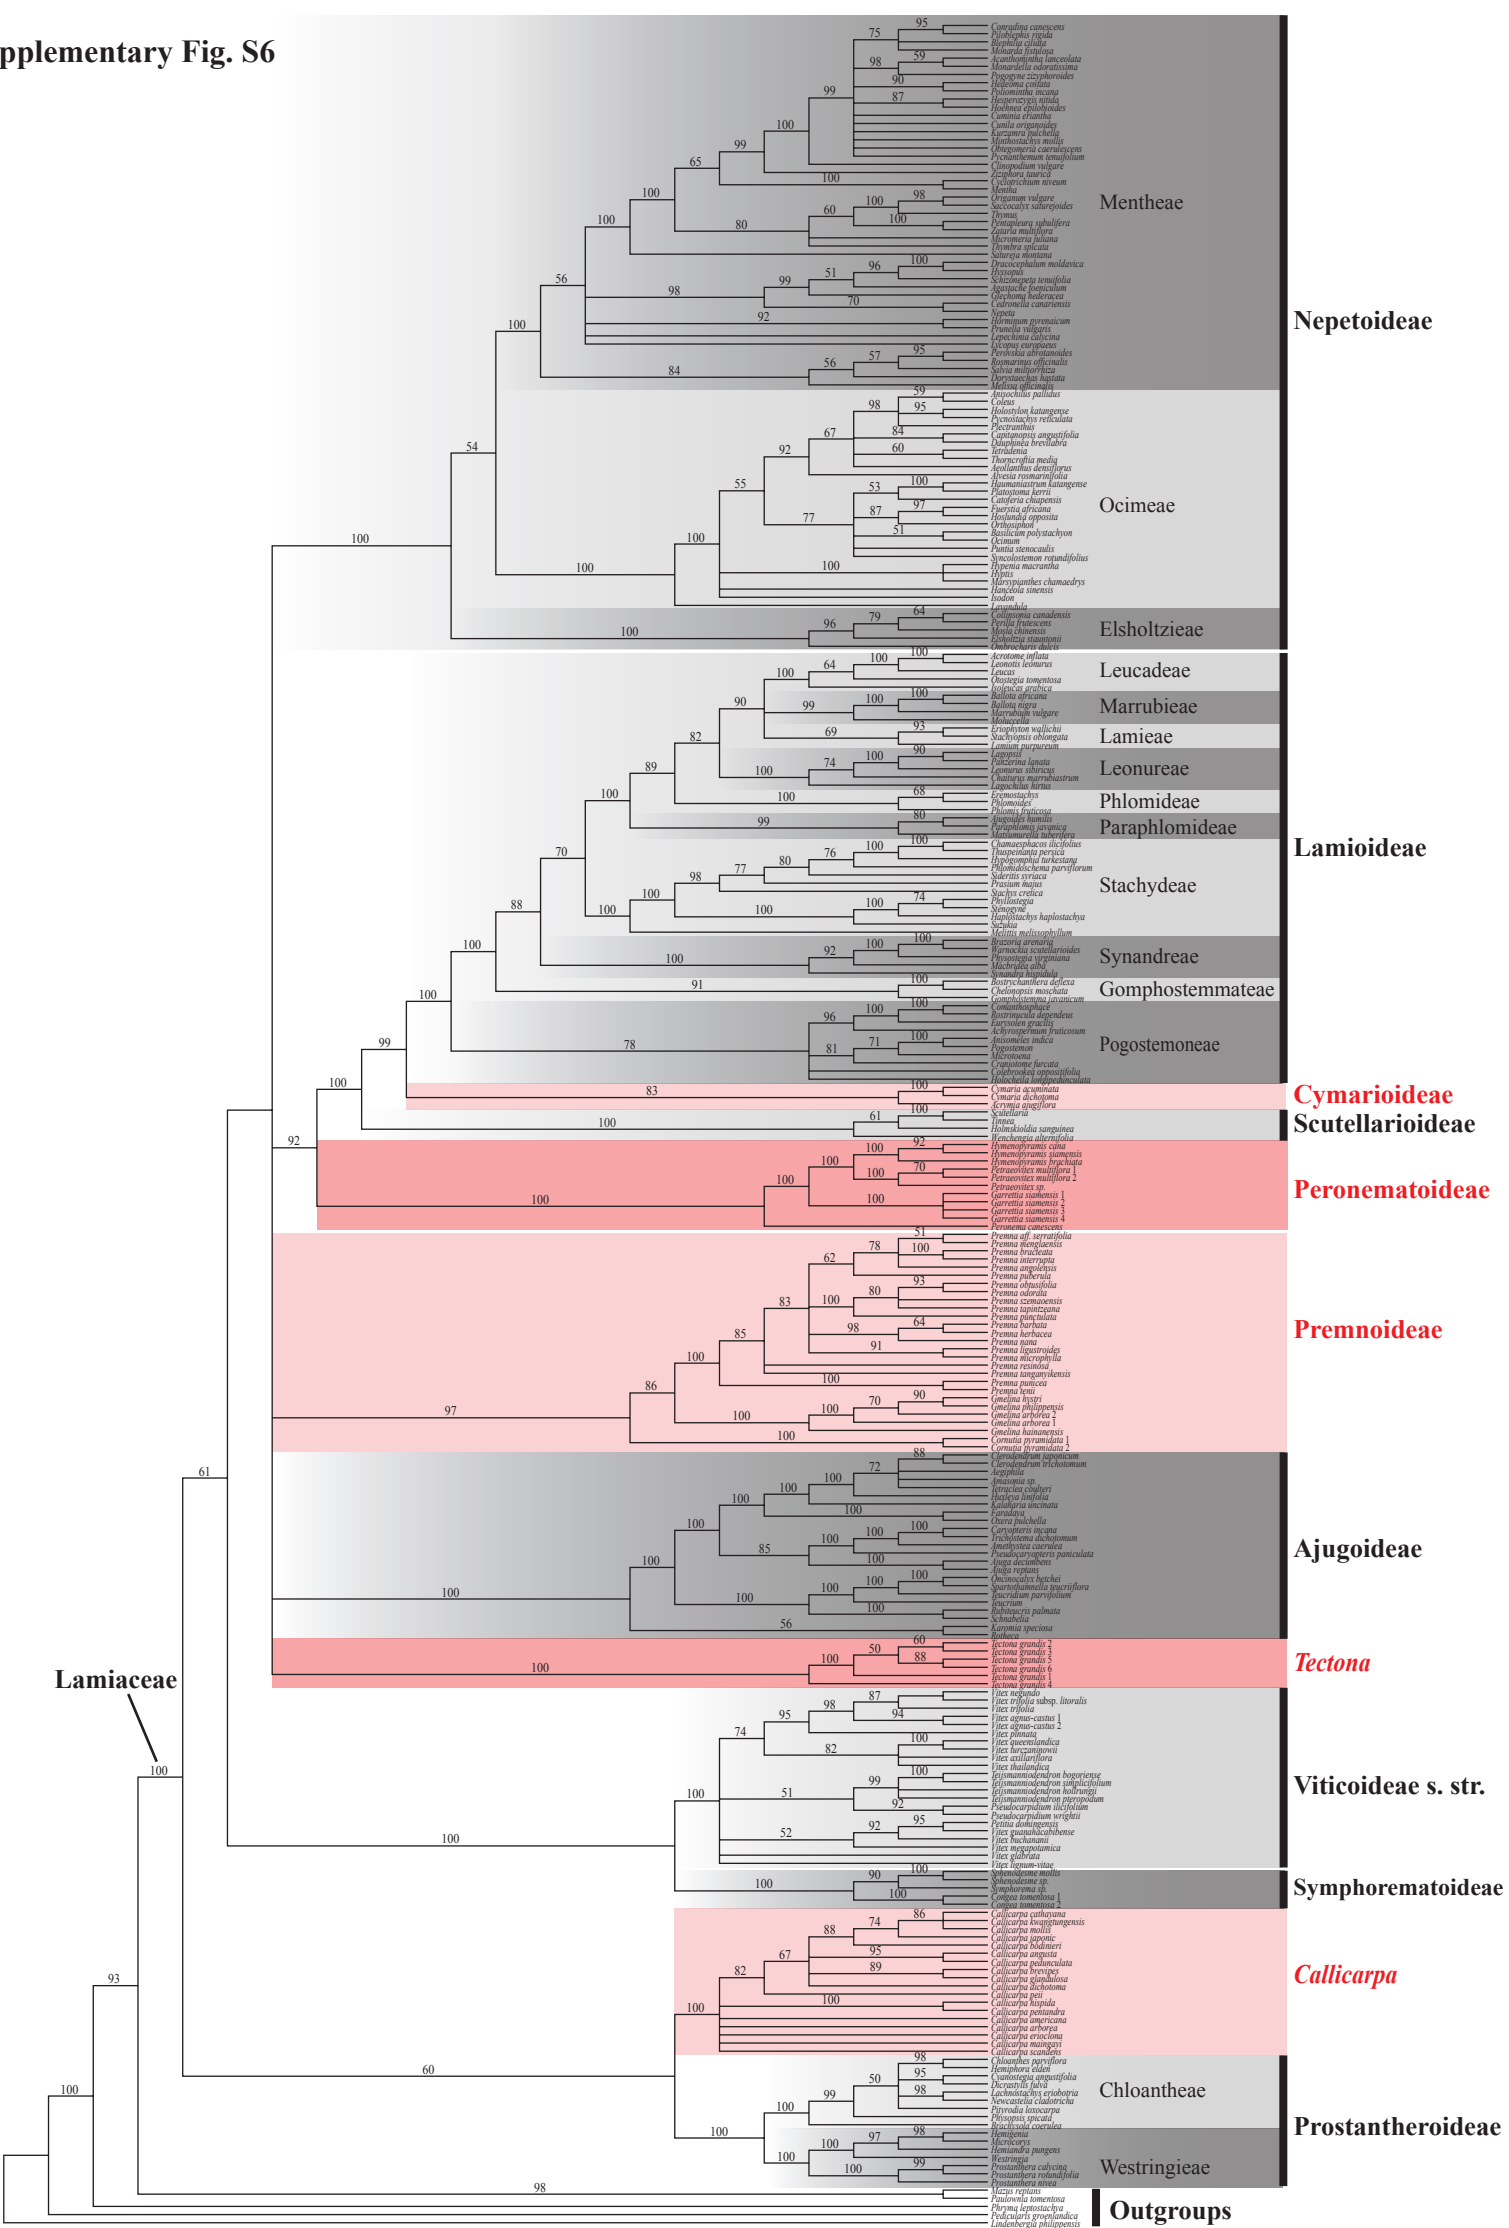

Supplementary Fig. S7

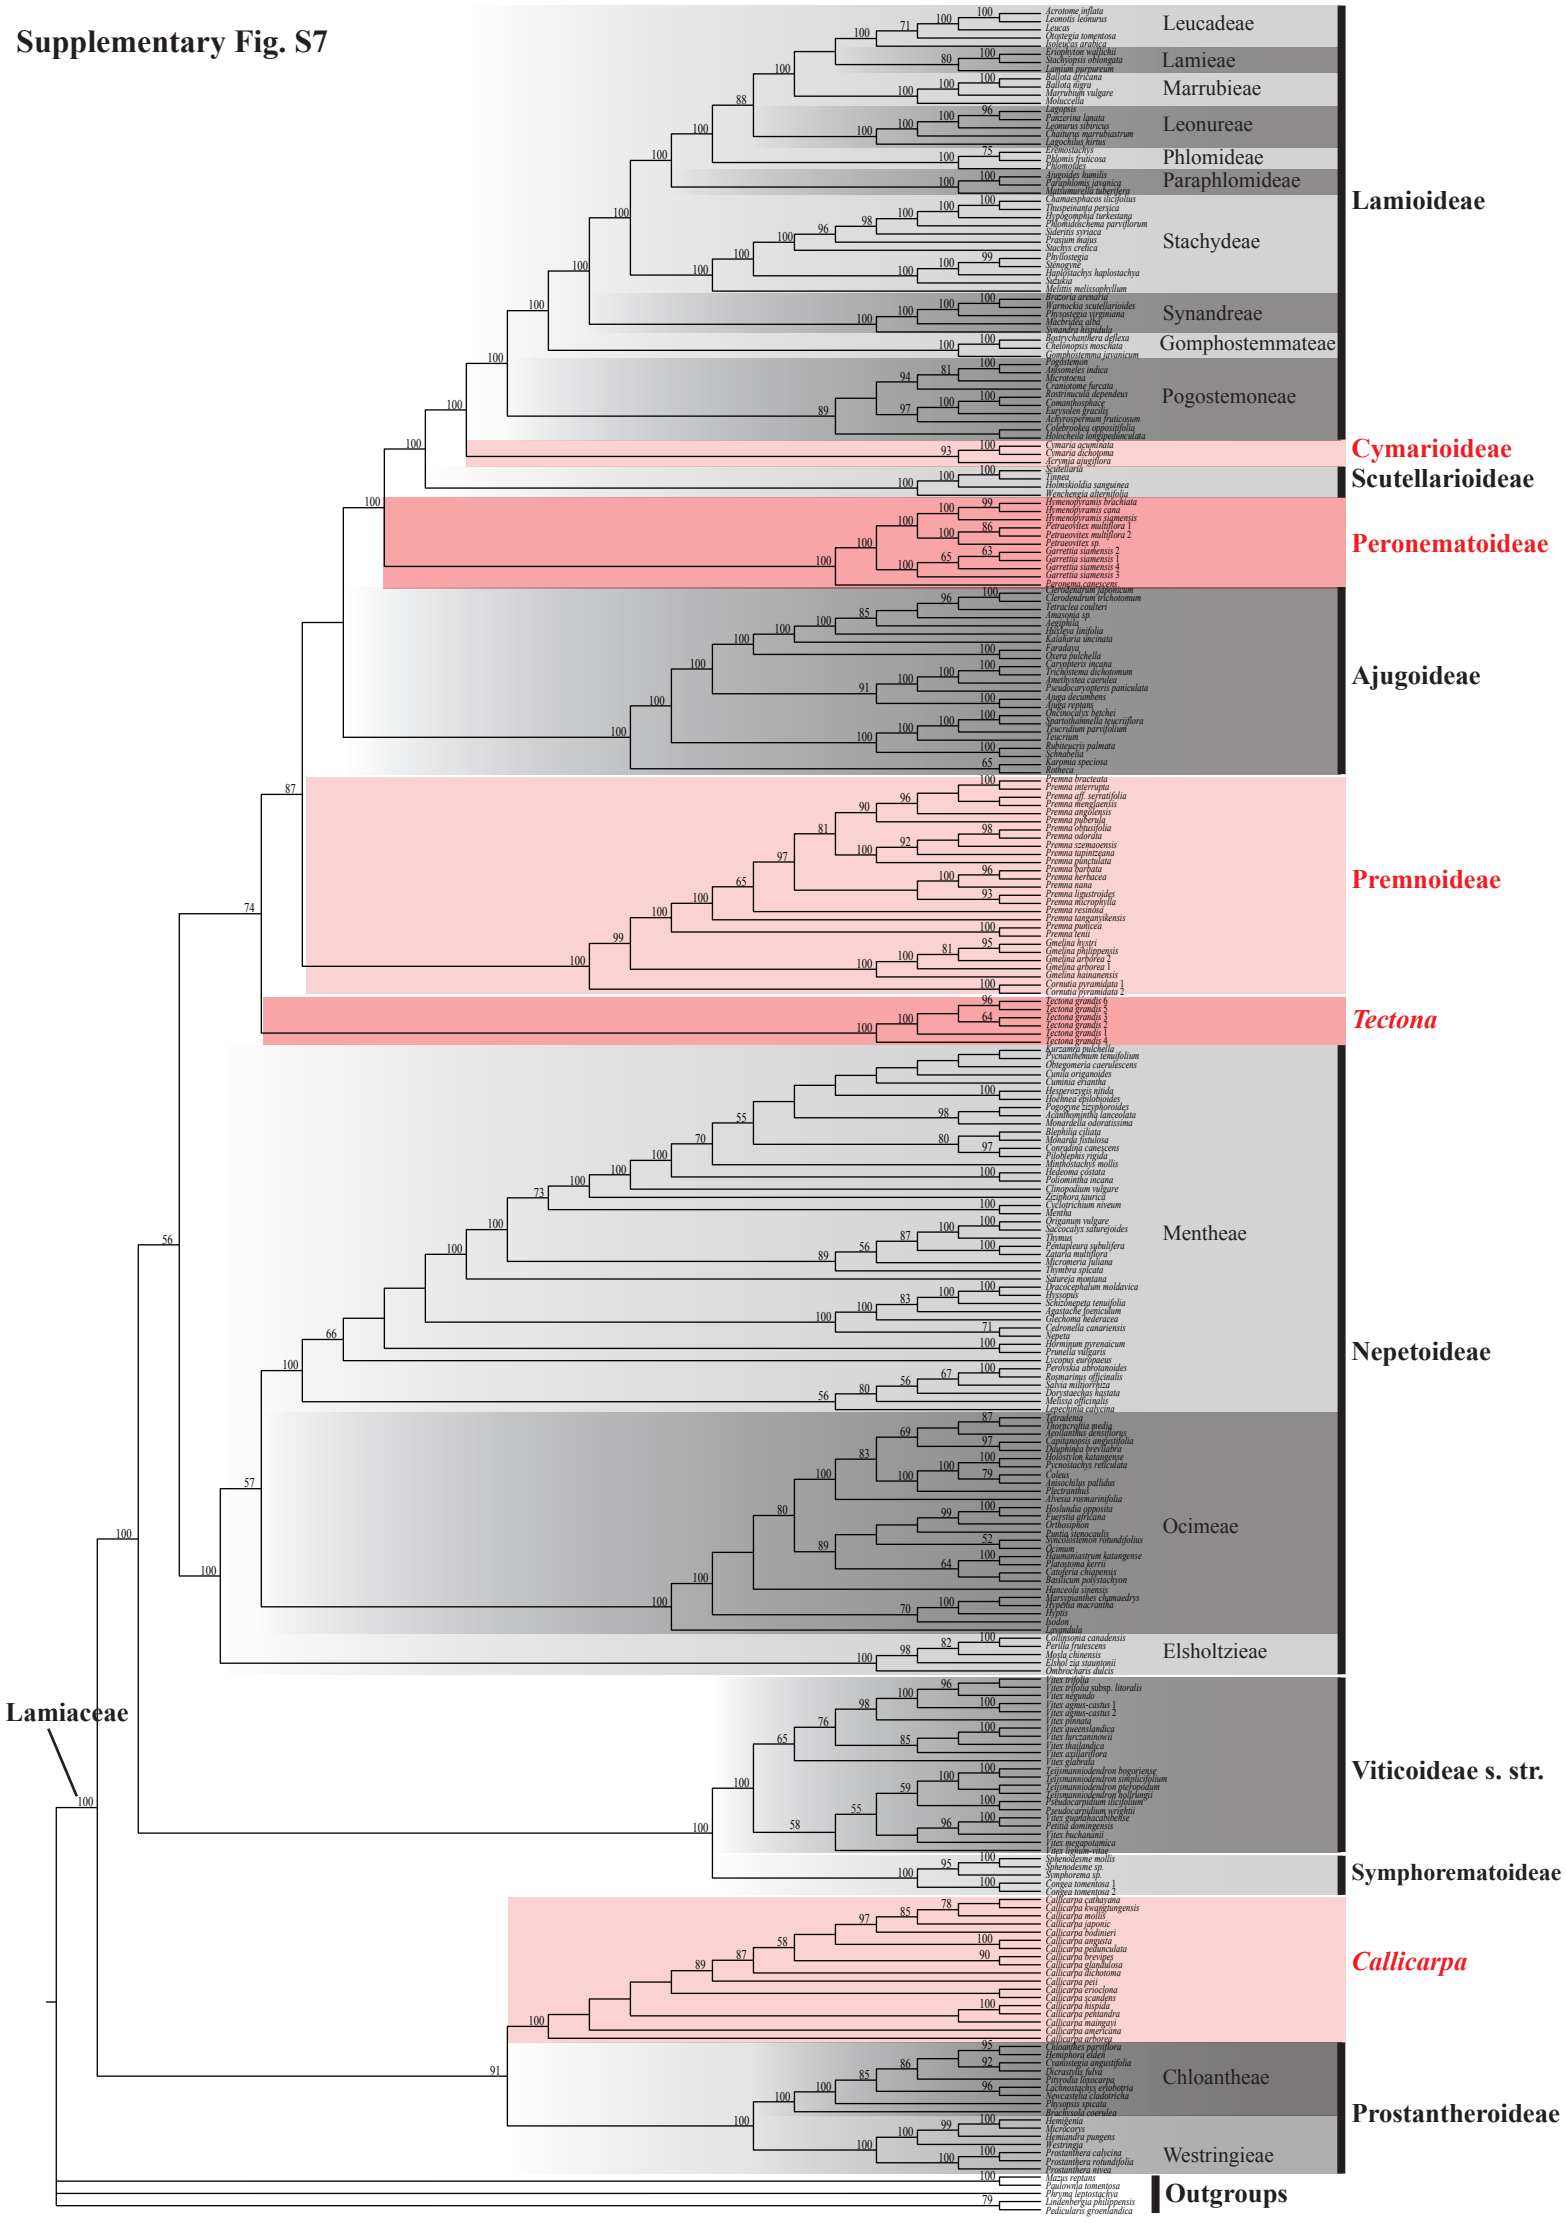





Supplementary Fig. S9

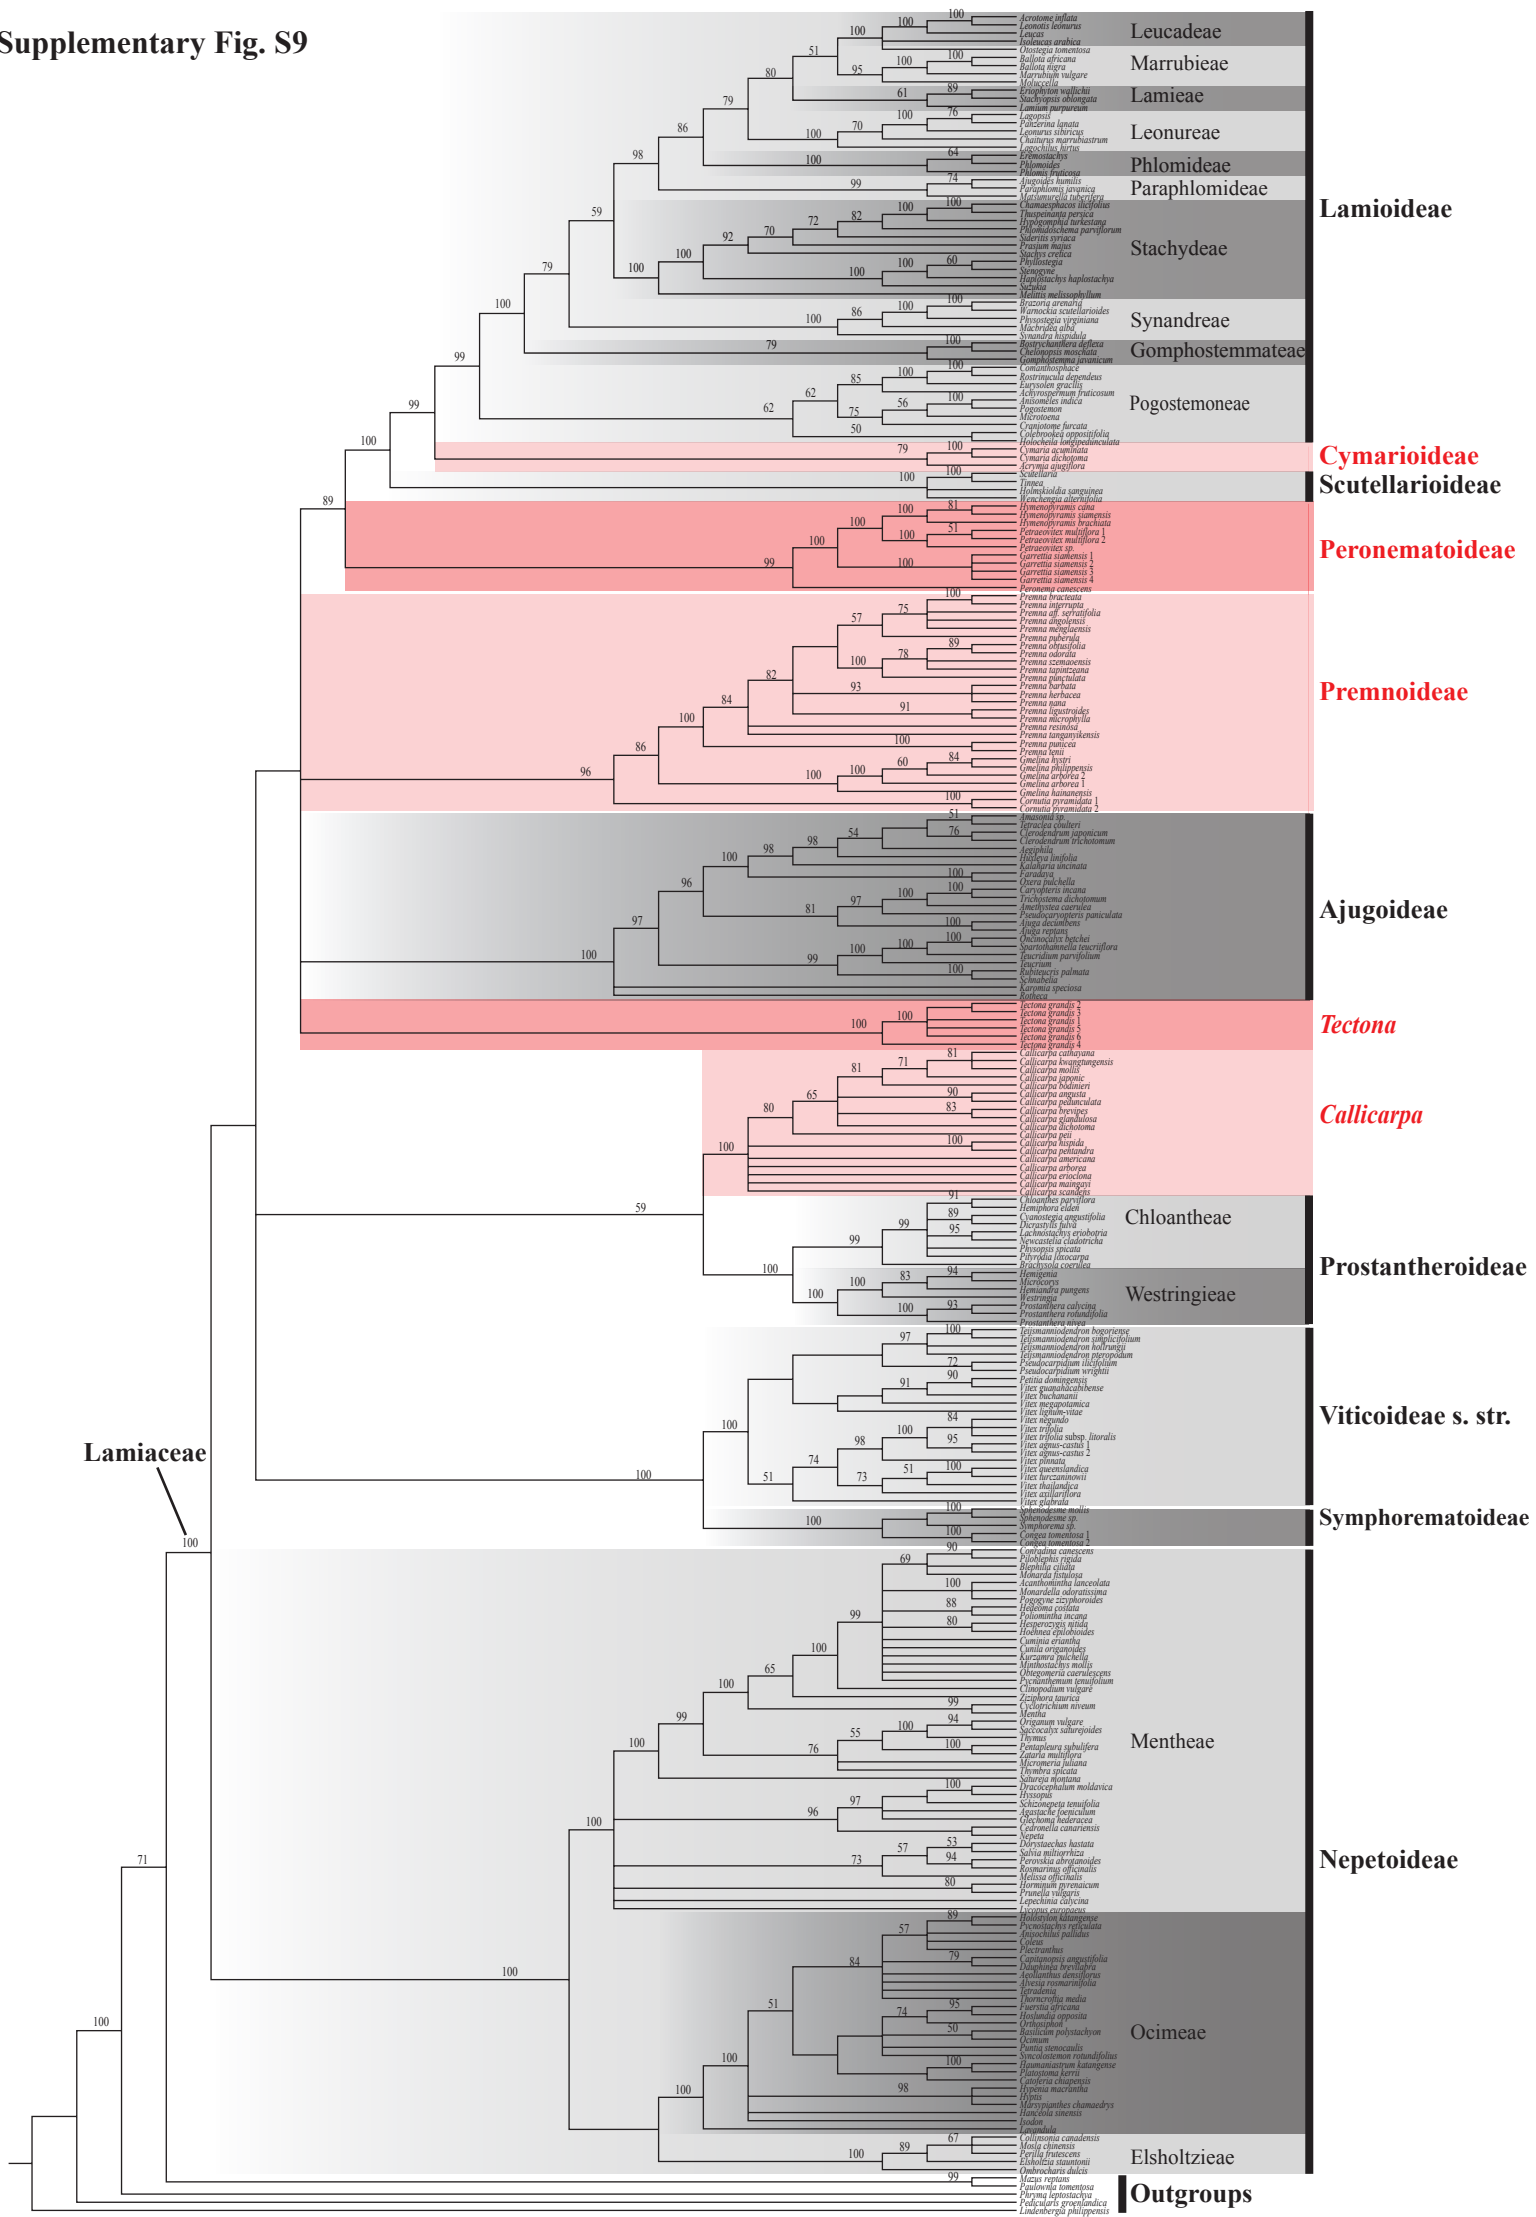



Supplementary Fig. S11

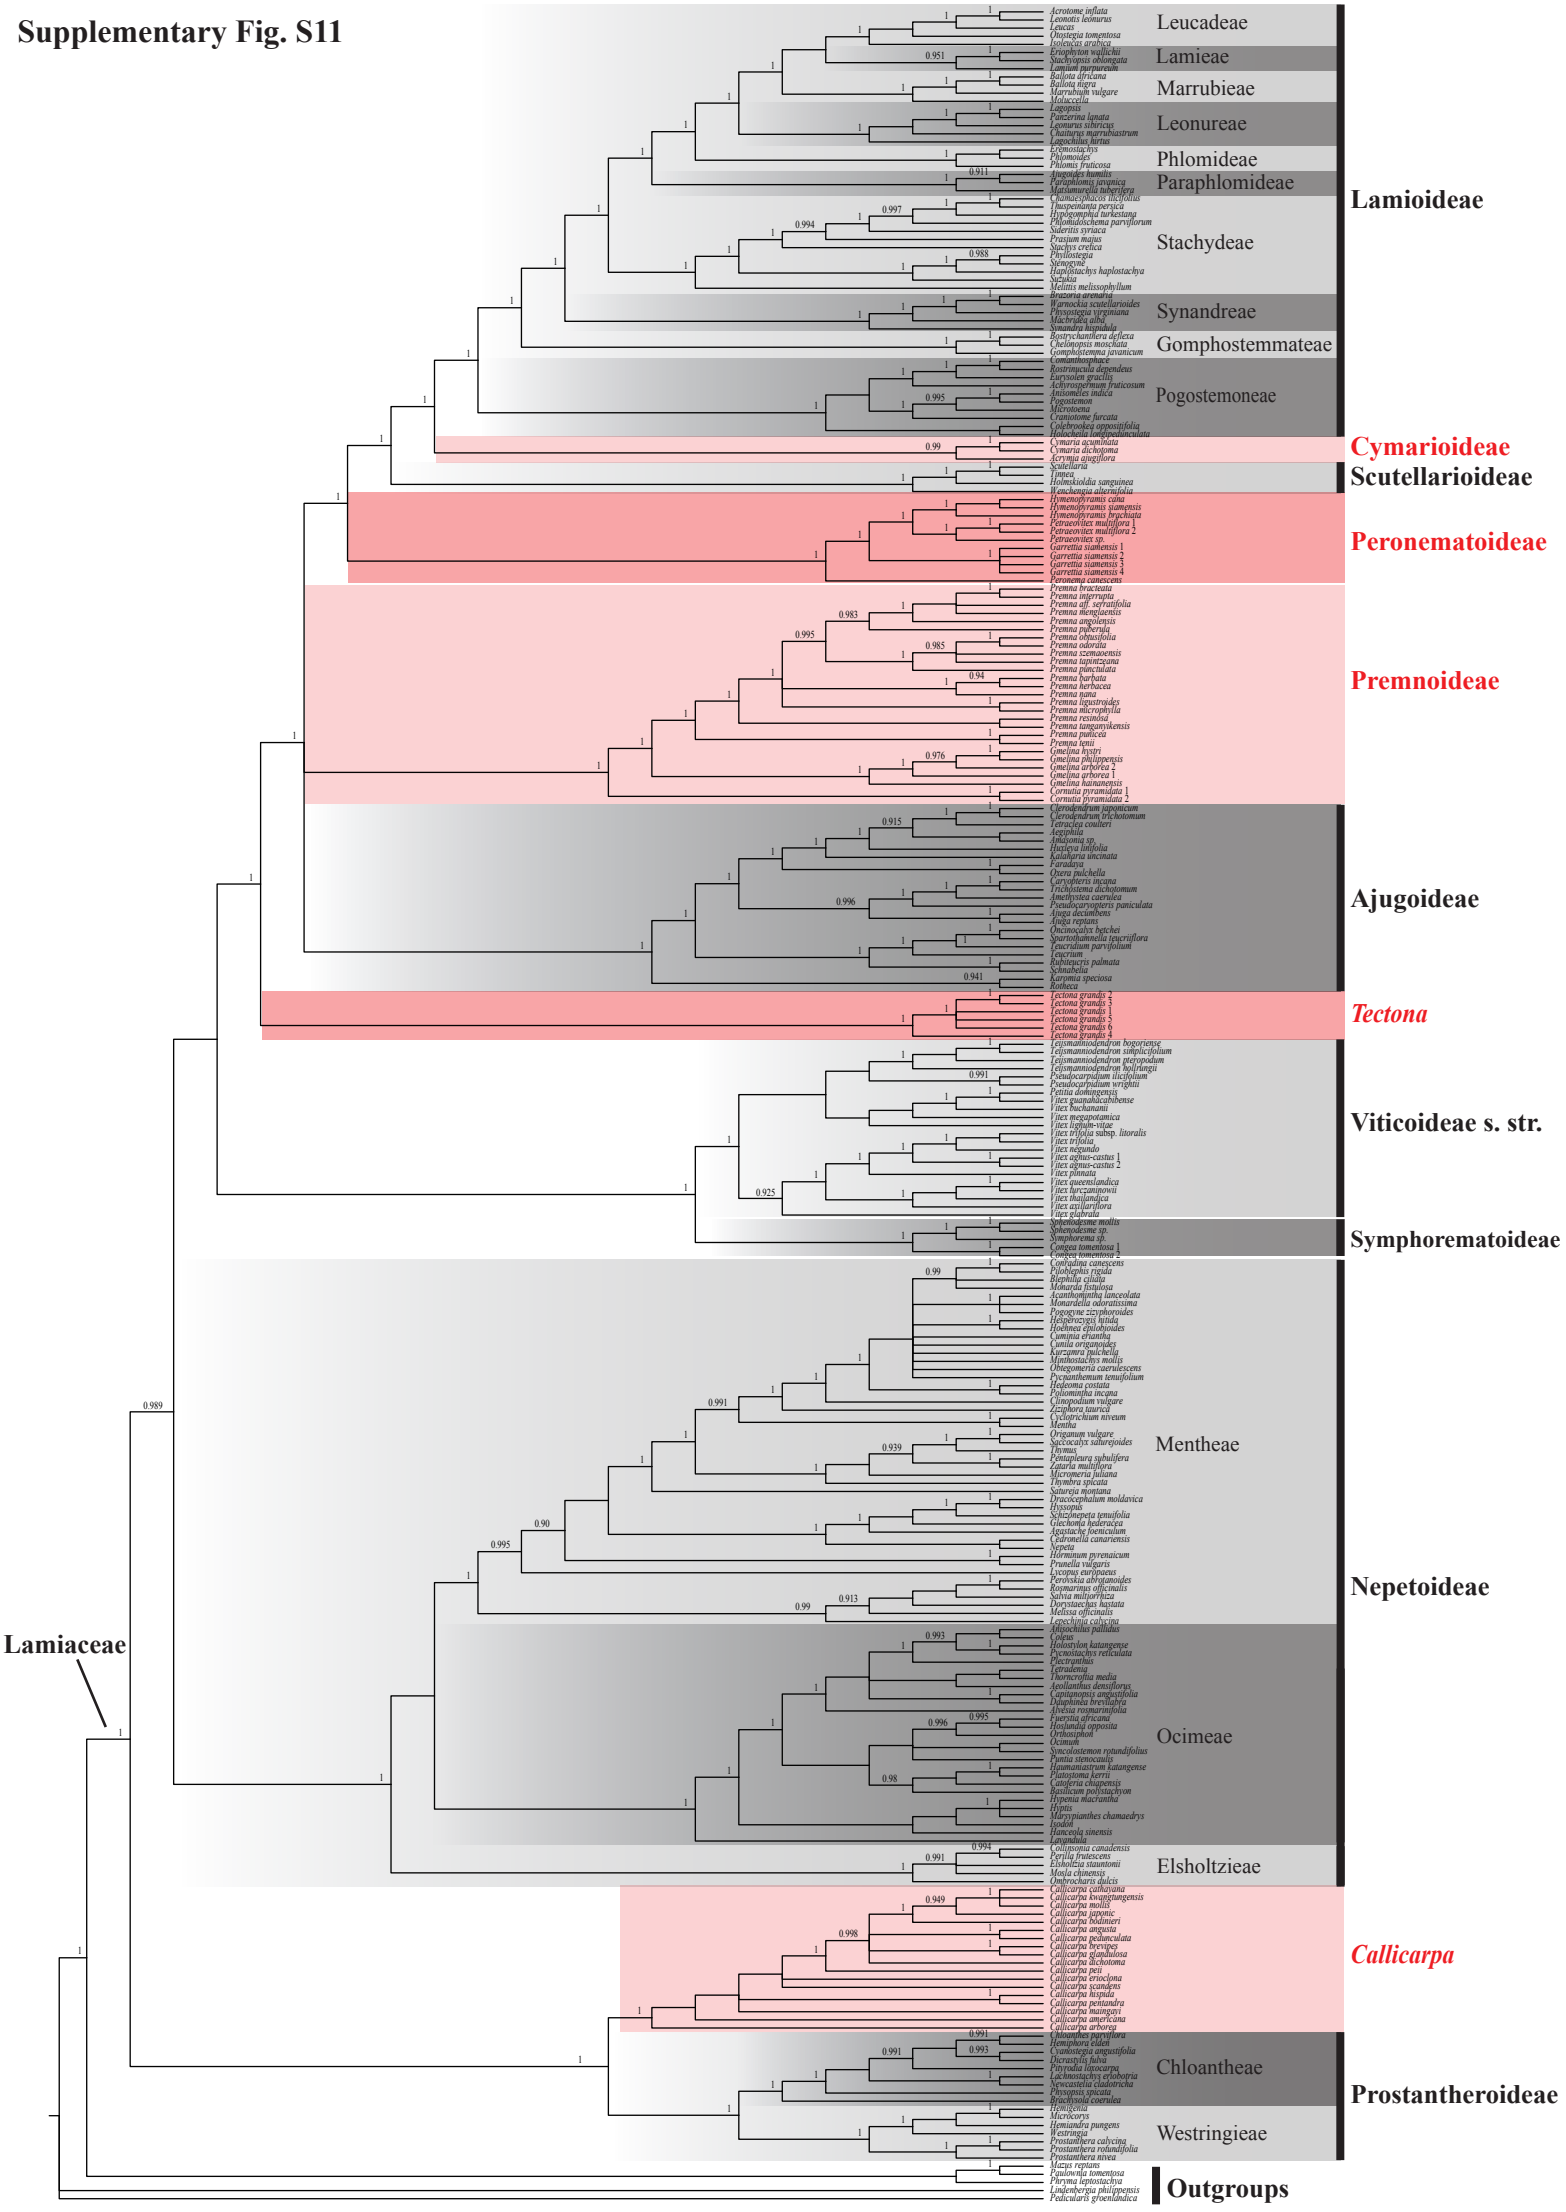

Supplementary Fig. S12

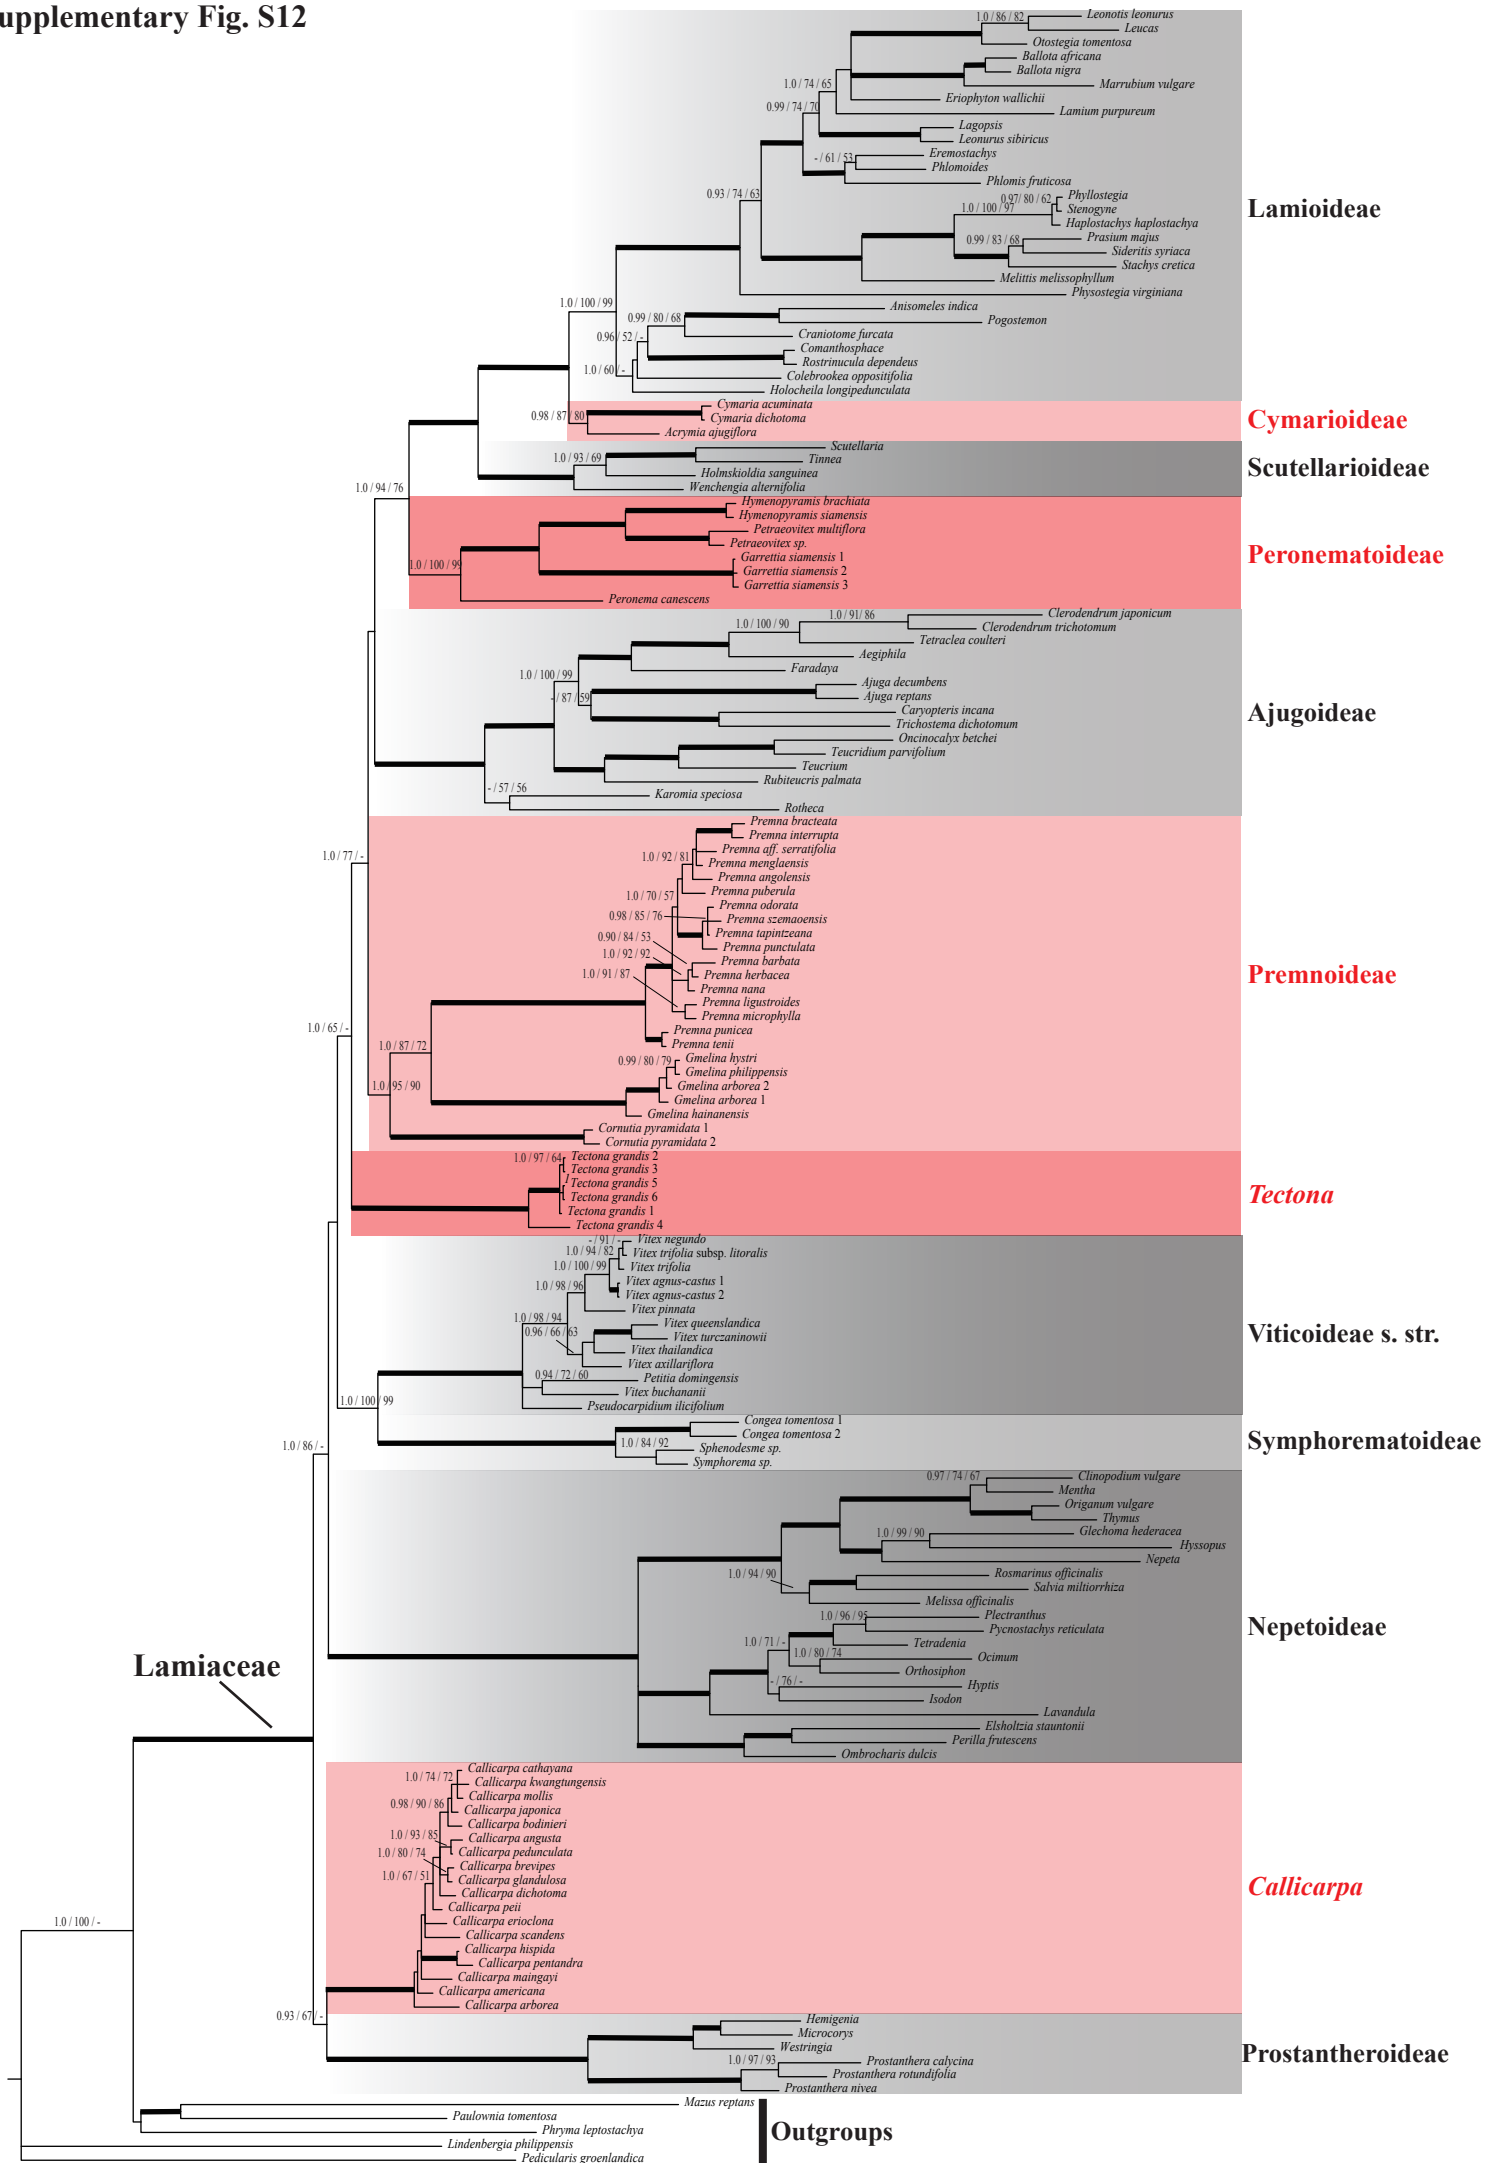

Supplement: srep34343-s1.pdf [file srep34343-s1.pdf]
